# Supplementary material for: Degradation of complex arabinoxylans by human colonic Bacteroidetes
Source: PubMed Central journal article supplement (PMC7815789; doi:10.1038/s41467-020-20737-5), 2021-01-19
Supplement: 41467_2020_20737_MOESM1_ESM.pdf [file 41467_2020_20737_MOESM1_ESM.pdf]

## Supplementary Information

# **Degradation of complex arabinoxylans by human colonic Bacteroidetes**

Pereira *et al.*

# a Soluble wheat arabinoxylan

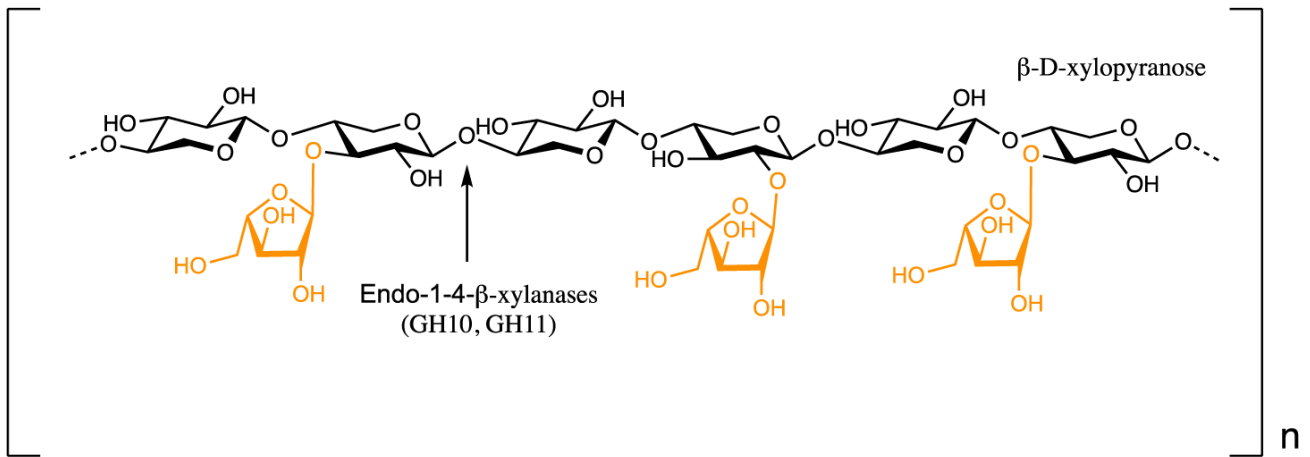

# b Insoluble wheat arabinoxylan

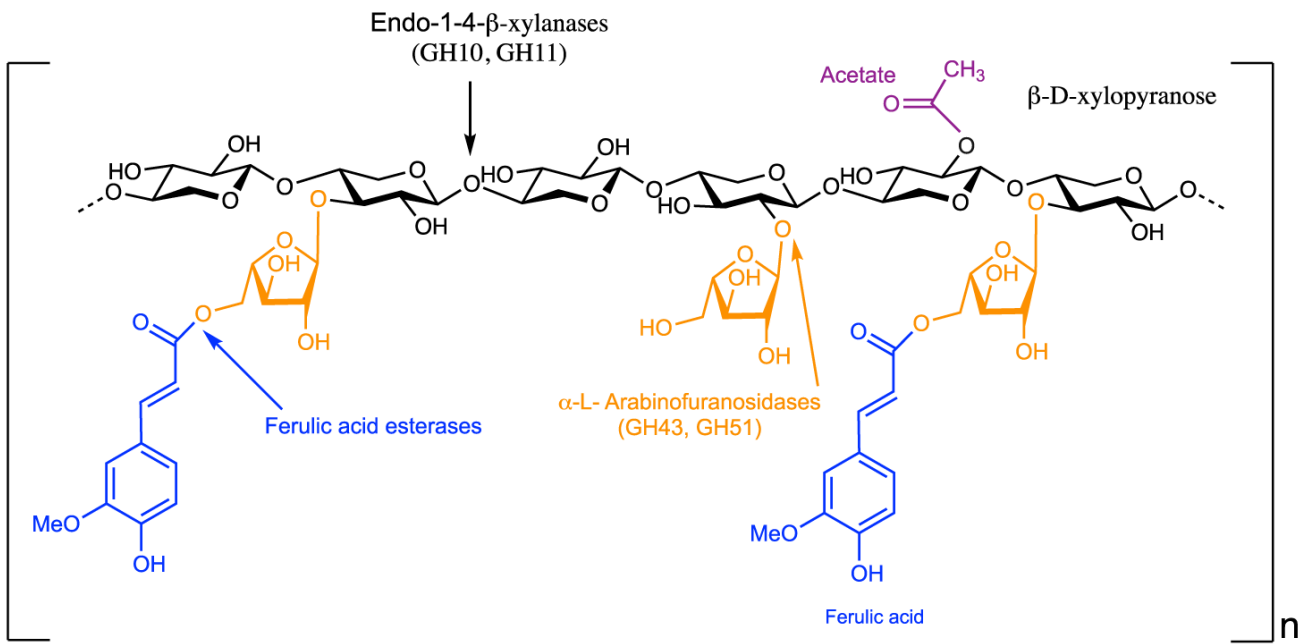

Other enzymes:  $\beta$ -xylosidase, acetylxylan esterase

**Supplementary Fig. 1. Schematic showing the differences in soluble and insoluble wheat arabinoxylan.** **a** Schematic structure of the soluble arabinoxylan used in this study showing the  $\beta$ -1,4-linked xylose backbone with arabinose side chains, but absence of ferulic acid. **b** Schematic structure of the insoluble arabinoxylan used in this study showing a similar structure to soluble arabinoxylan but with ferulic acid side chains. Common enzymes known to cleave some of the linkages in arabinoxylan are indicated, including GH10, GH11 families of endoxylanases, GH43, GH51  $\alpha$ -arabinofuranosidases, Ferulic acid esterase, acetyl xylan esterase (catalyzes cleavage of backbone acetyl substituents) and  $\beta$ -xylosidase (cleaves xylo-oligosaccharides into xylose). The n indicates the polysaccharide length is long and variable.

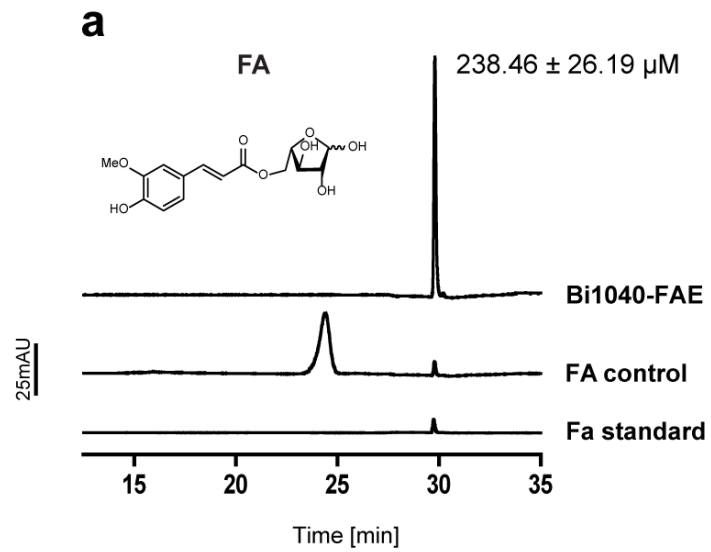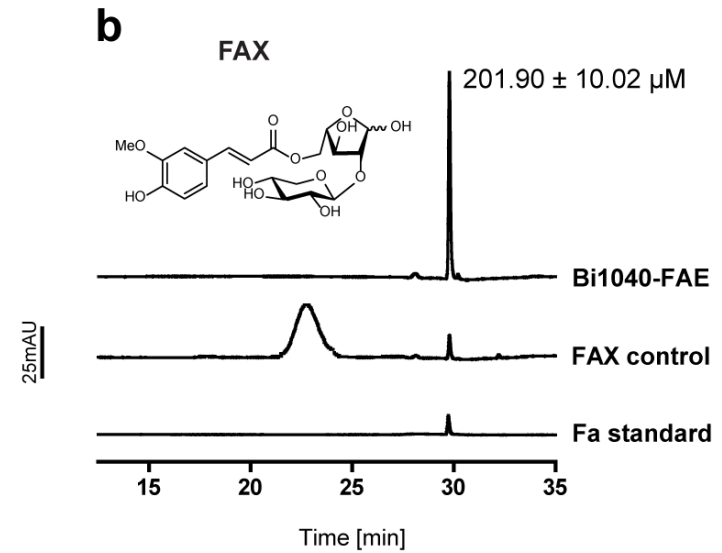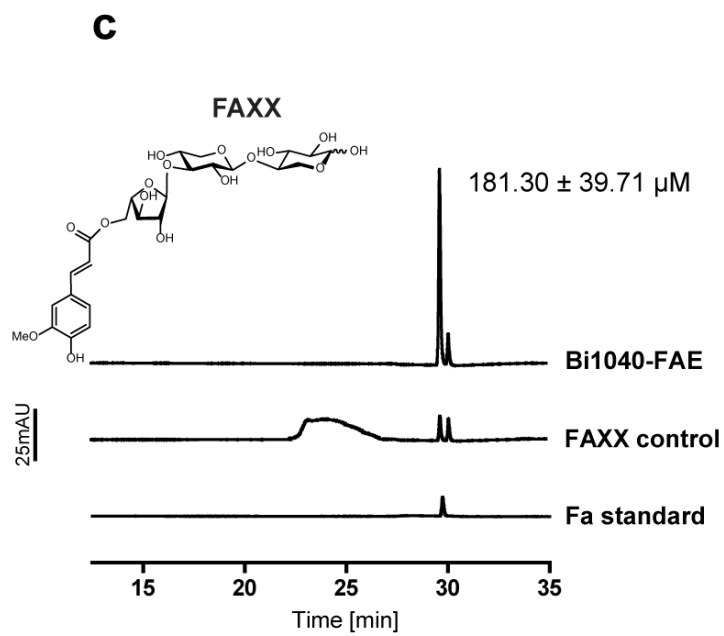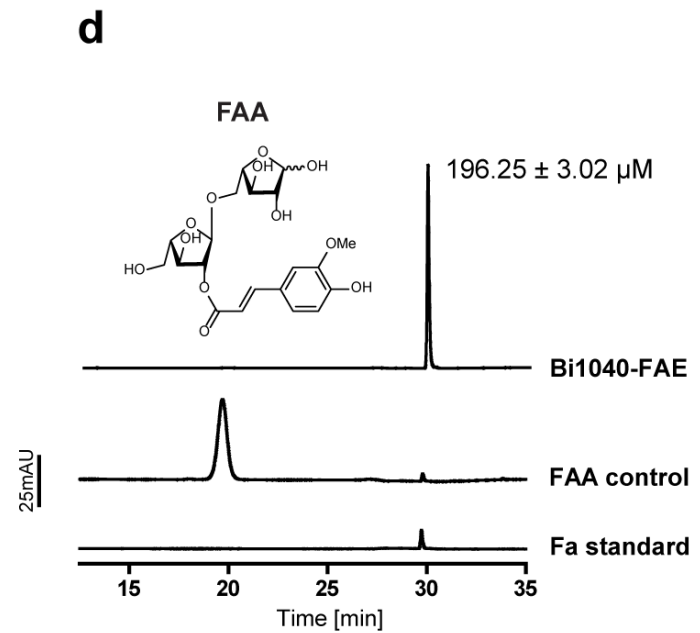

**Supplementary Fig. 2. Cleavage of ferulic acid from feruloylated oligosaccharides by Bi1040-FAE.** The hydrolytic reactions contained 50 nM of enzyme (Bi1040-FAE) with 200  $\mu$ M of the respective feruloylated oligosaccharide (with structure shown). **a** Incubated with FA (ferulic acid linked to arabinose). **b** Incubated with FAX (ferulic acid linked to a disaccharide of arabinose and xylose). **c** Incubated with FAXX (ferulic acid linked to a trisaccharide of arabinose and two xylose residues). **d** Incubated with FAA (ferulic acid linked to arabinobiose). All reactions were carried out for 10 minutes at 37 °C in a buffer of pH 6.5. The end products were analyzed by C18-HPLC, as described in the Methods section. Fa: ferulic acid. The y-axis is absorbance in milli-absorbance units (mAU). The results are presented as the mean  $\pm$  the standard deviation of three independent reactions (n=3), and the traces are representatives of the three different reactions. The source data underlying Supplementary Fig. 2 are provided in the Source Data file.

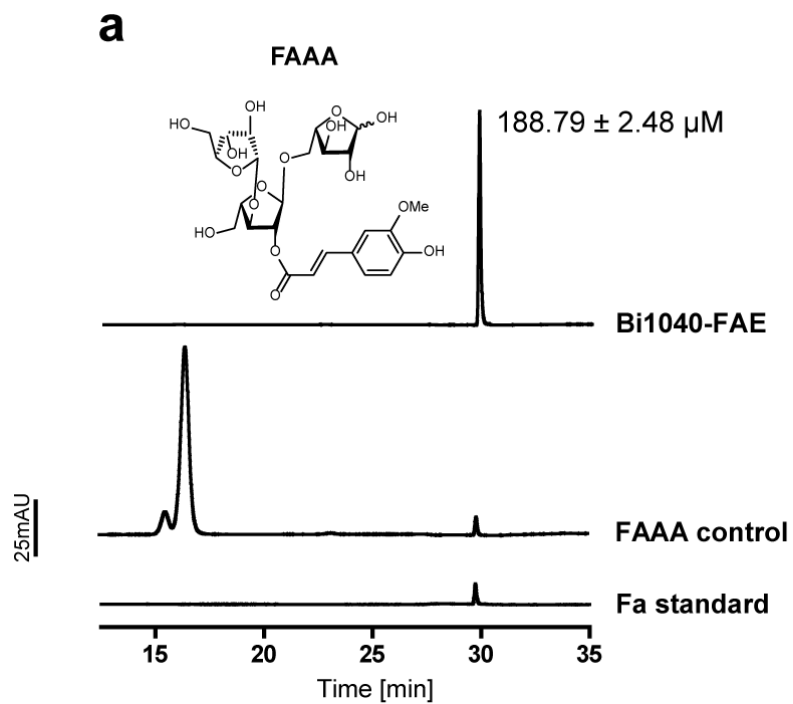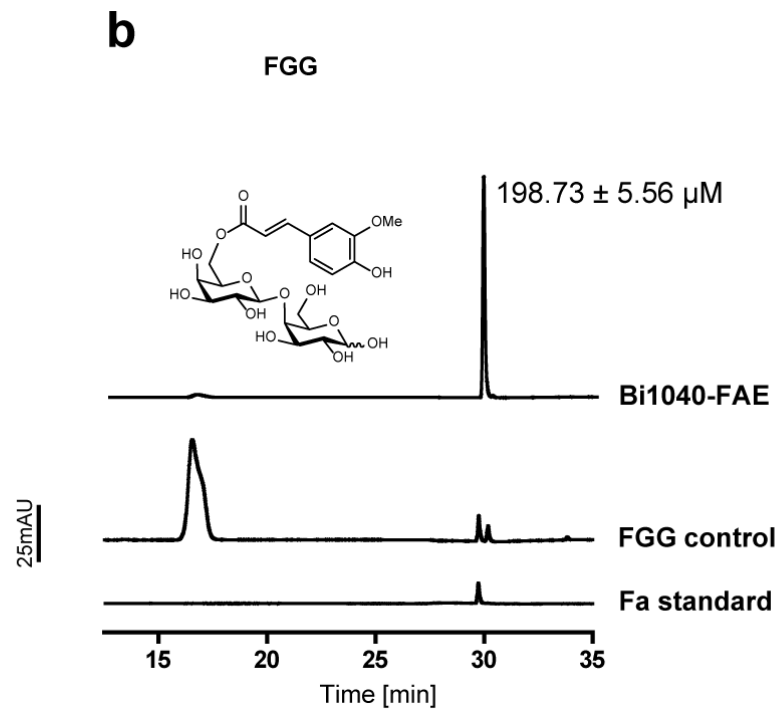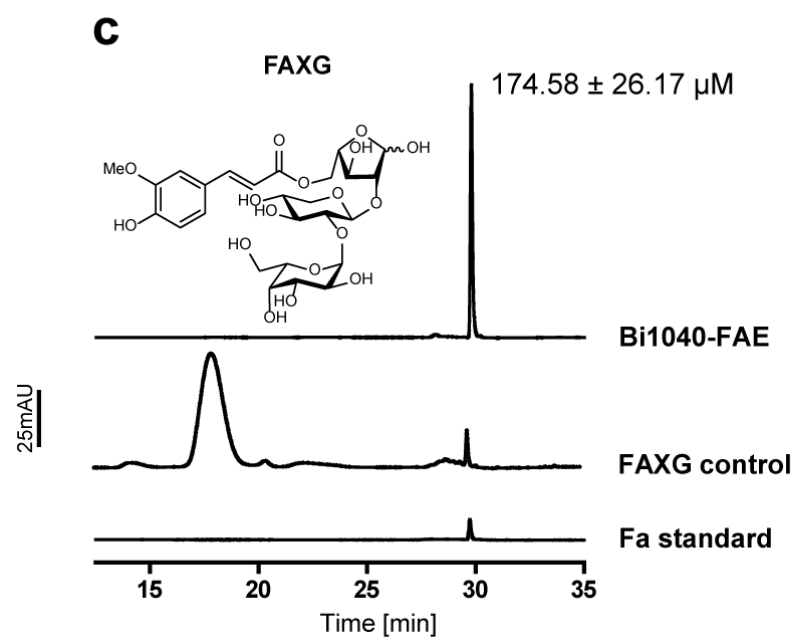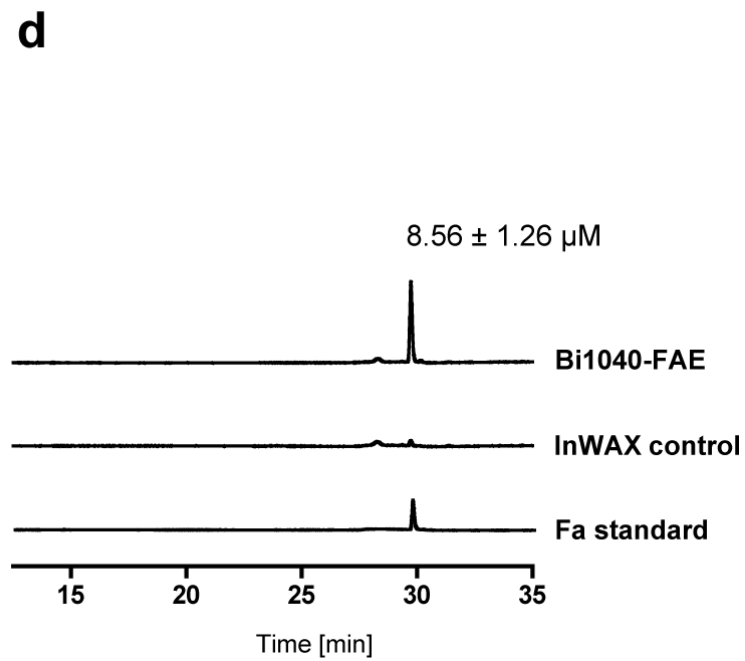

**Supplementary Fig 3. Cleavage of ferulic acid from feruloylated oligosaccharides and InWAX by Bi1040-FAE.** The hydrolytic reactions contained 50 nM of enzyme (Bi1040-FAE) with 200  $\mu$ M of the respective feruloylated oligosaccharide (with structure shown). **a** Incubated with FAAA (ferulic acid linked to arabinotriose). **b** Incubated with FGG (ferulic acid linked to cellobiose or disaccharide of glucose). **c** Incubated with FAXG (ferulic acid linked to a trisaccharide of arabinose, xylose and glucose). **d** Incubated with InWAX (insoluble wheat arabinoxylan). All reactions were carried out for 10 minutes at 37 °C in a buffer of pH 6.5. The end products were analyzed by C18-HPLC, as described in the Methods section. Fa: ferulic acid. The y-axis is absorbance in milli-absorbance units (mAU). The results are presented as the mean  $\pm$  the standard deviation of three independent reactions (n=3), and the traces are representatives of the three different reactions. The source data underlying Supplementary Fig. 3 are provided in the Source Data file.

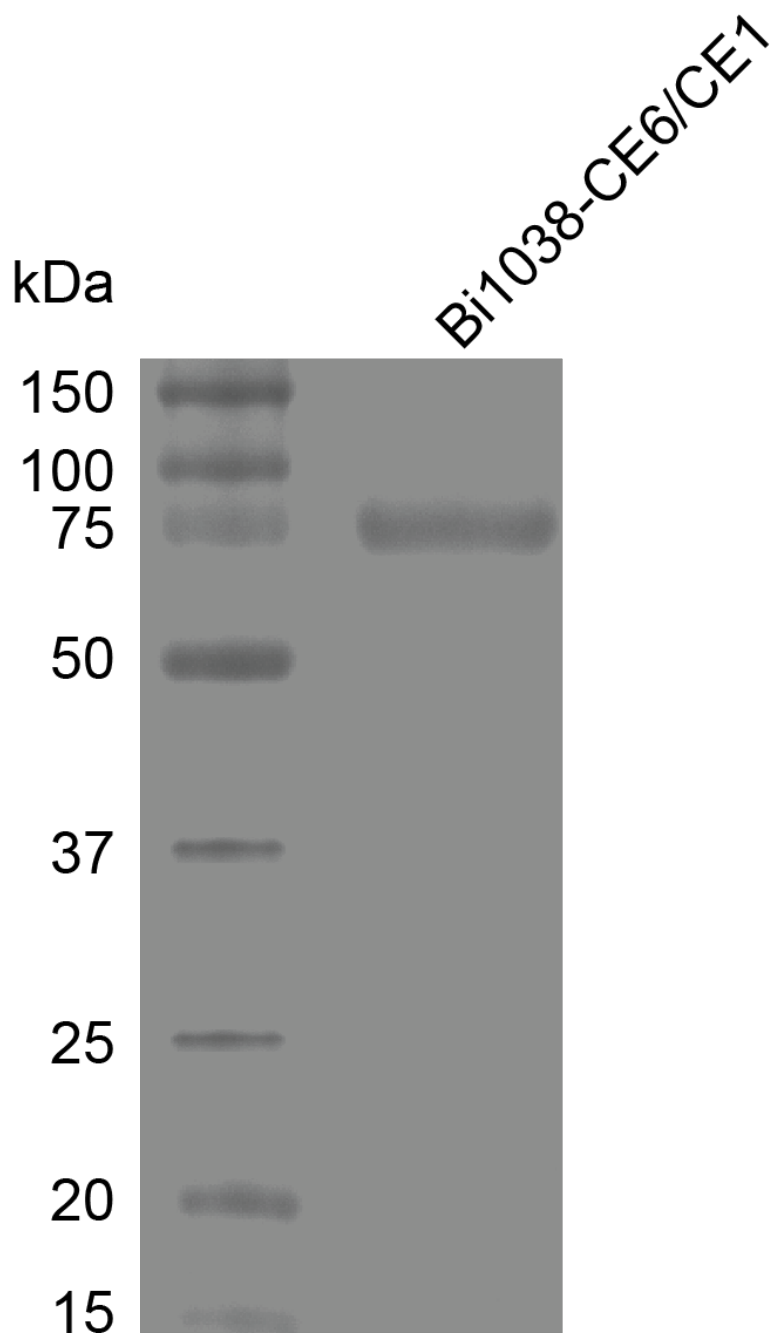

**Supplementary Fig. 4. The serine protease inhibitor, benzamidine HCl, inhibits cleavage of recombinant Bi1038-CE6/CE1 during purification from *E. coli* cells.** A 12% SDS-PAGE showing purified full length Bi1038-CE6/CE1, achievable by adding benzamidine HCl at a concentration of 1 mM to the buffers for re-suspension of recombinant *E. coli* cells and buffers for protein purification. The recombinant protein was resolved on SDS-PAGE during the purification steps to ensure that it migrates according to its predicted molecular mass, and finally a single SDS-PAGE was ran to obtain this image showing migration to the same position relative to the protein molecular mass markers.



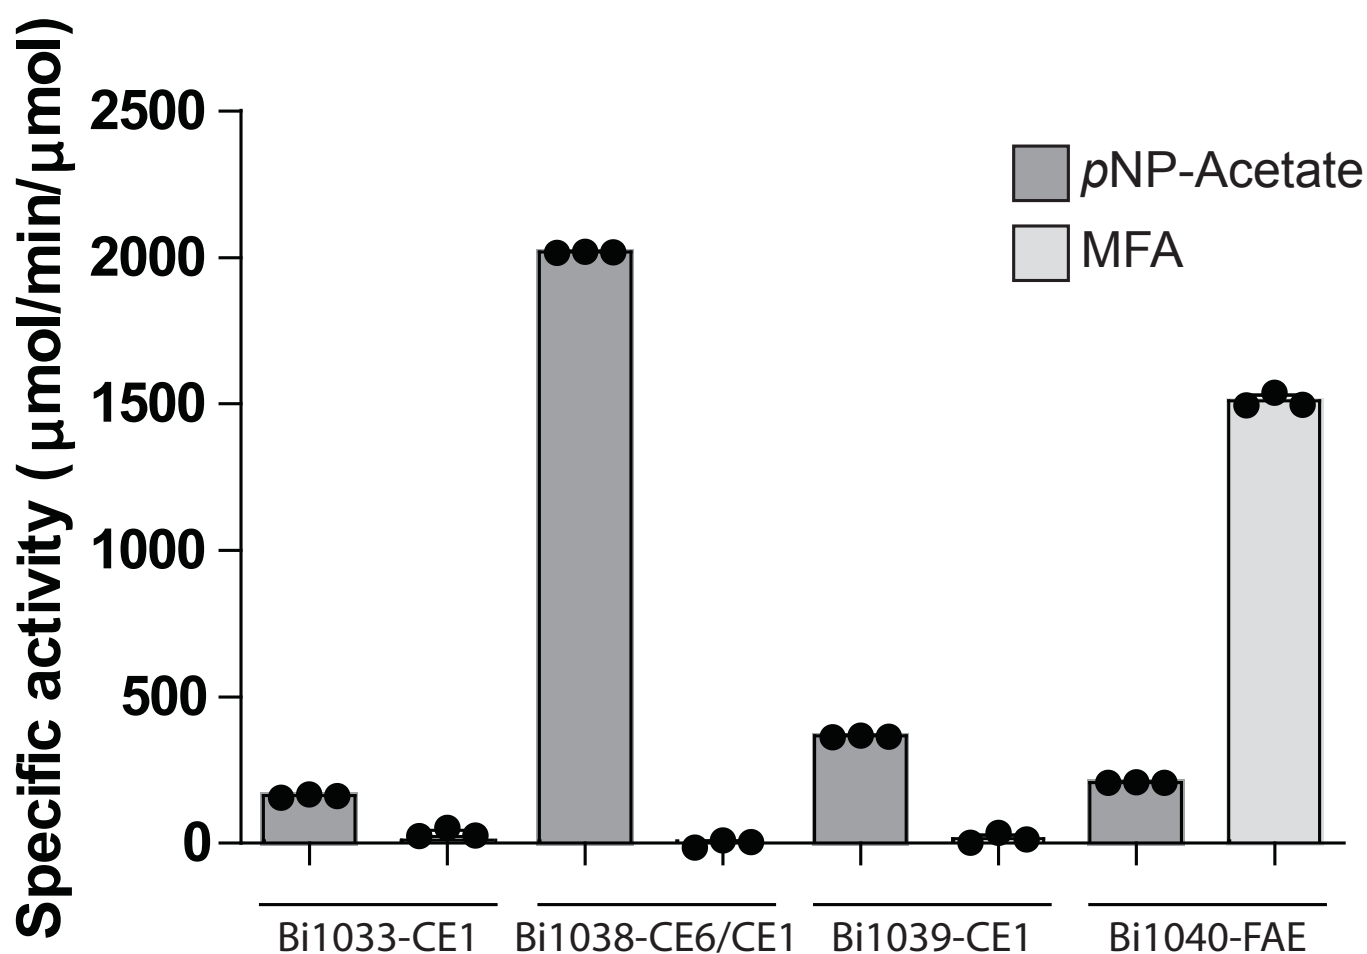

**Supplementary Fig. 5. Hydrolytic activities of the recombinant esterases from the *B. intestinalis* EGE PUL.** The two synthetic substrates methyl ferulate (MFA) and *para*-nitrophenyl acetate (*p*-NP Acetate) were used to analyze for ferulic acid esterase and acetyl xylan esterase activities, respectively, among the recombinant esterases expressed from the *B. intestinalis* EGE PUL. The reactions were carried out in a 0.1 M MOPS buffer at pH 7.5 and at a temperature of 37 °C. The results are the mean specific activity  $\pm$  standard deviation of three independent reactions ( $n = 3$ ). The source data underlying Supplementary Fig. 5 are provided in the Source Data file.

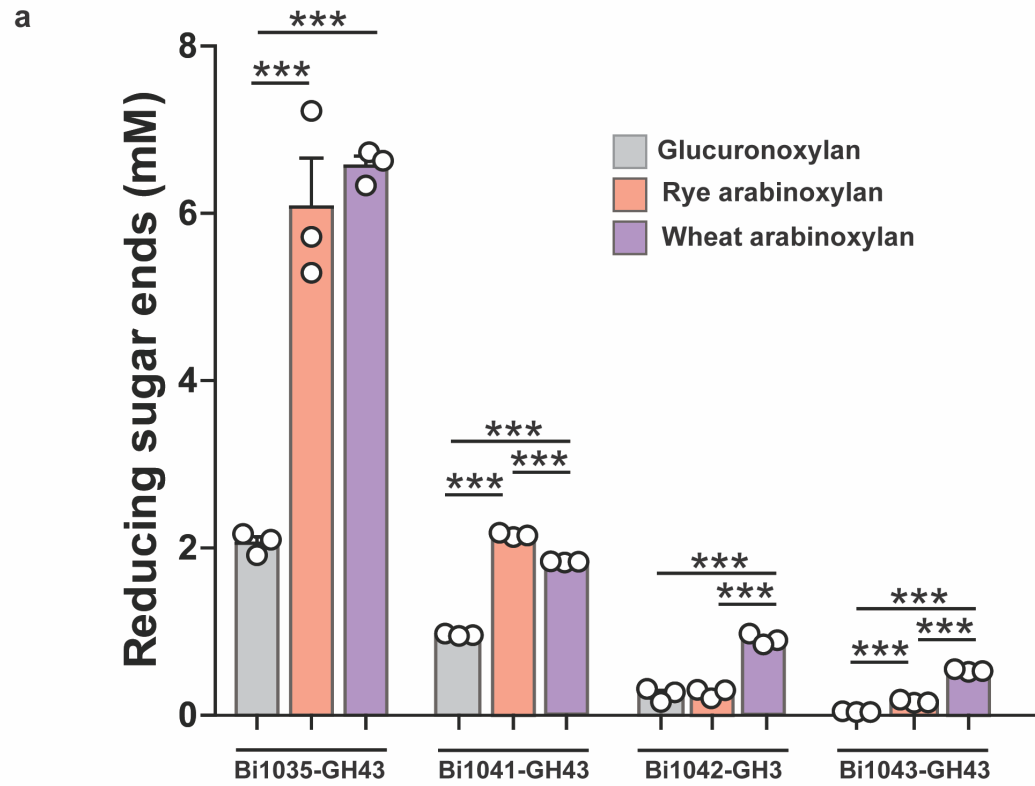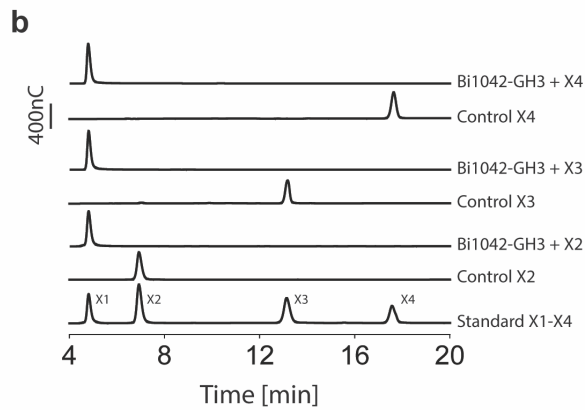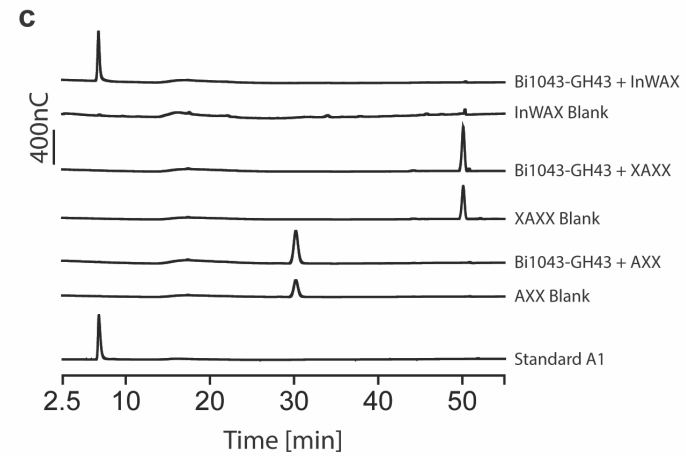

**Supplementary Fig 6. Hydrolytic activities of the glycoside hydrolases encoded in the EGE PUL of *B. intestinalis*.** **a** The reducing ends released from xylan polysaccharide substrates by the putative glycoside hydrolases in the *B. intestinalis* EGE PUL. **b**  $\beta$ -xylosidase activity of Bi1042-GH3 towards xylo-oligosaccharides. **c** Arabinoxylan polysaccharide-dependent  $\alpha$ -arabinofuranosidase activity of Bi1043-GH43. Rye arabinoxylan (Megazyme) has a backbone of xylose linked in  $\beta$ -1,4 glycosidic linkages and arabinose side chains at the O-2 or O-3 positions or both. The ratio of arabinose to xylose is 40:60. Glucuronoxylan (Sigma) has a backbone of xylose linked in  $\beta$ -1,4 glycosidic linkages and glucuronate side chains at the O-2 or O-3 positions or both, which are commonly methylated at position 4. Wheat arabinoxylan (Megazyme) has a backbone of xylose linked in  $\beta$ -1,4 glycosidic linkages and arabinose side chains at the O-2 or O-3 positions or both. The ratio of arabinose to xylose is 38:62. X1: xylose, X2: xylobiose, X3: xylotriose, X4: xylotetraose, AXX: a trisaccharide of arabinose and two xylose residues, XAXX: a tetra-saccharide of xylose, arabinose and two xylose residues, and InWAX: insoluble wheat arabinoxylan (see Supplementary Fig. 1b). In **a**, the bars indicate means  $\pm$  standard deviation of three independent reactions (n=3). Statistical analysis was performed using one-way Analysis of Variance (ANOVA) with multiple comparisons using Tukey's test, \*p<0.033, \*\*p<0.002, \*\*\*p<0.001. The experiments reported in **b** and **c** were carried out in single reactions. The source data underlying Supplementary Fig. 6a are provided in the Source Data file.

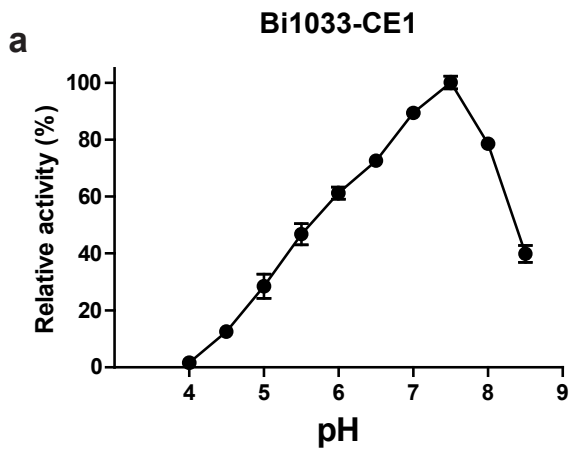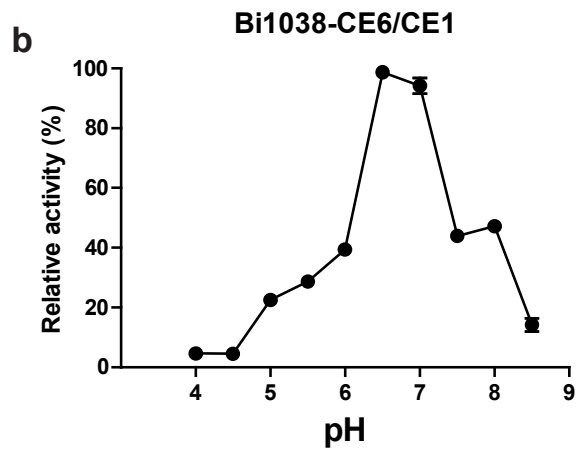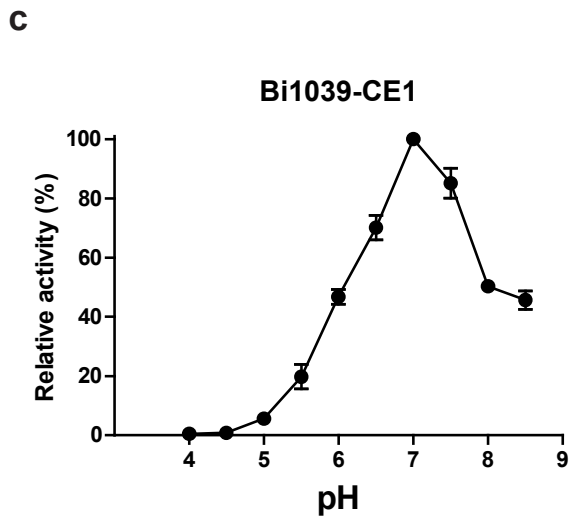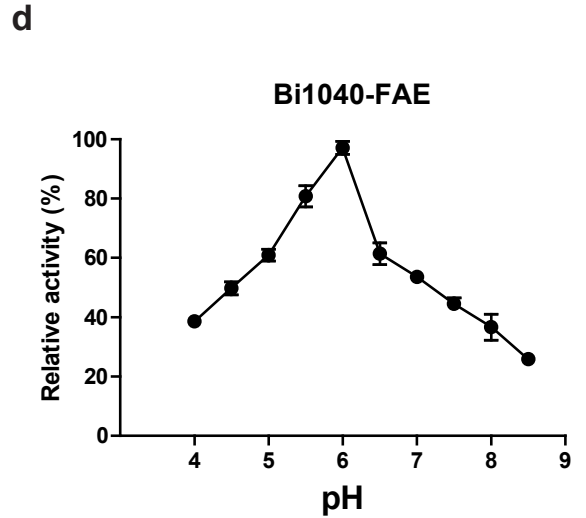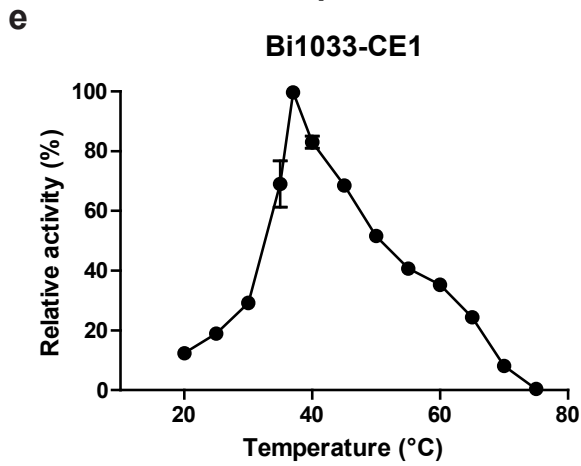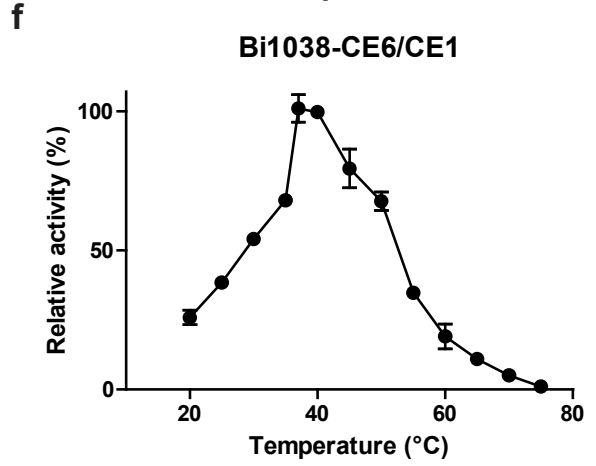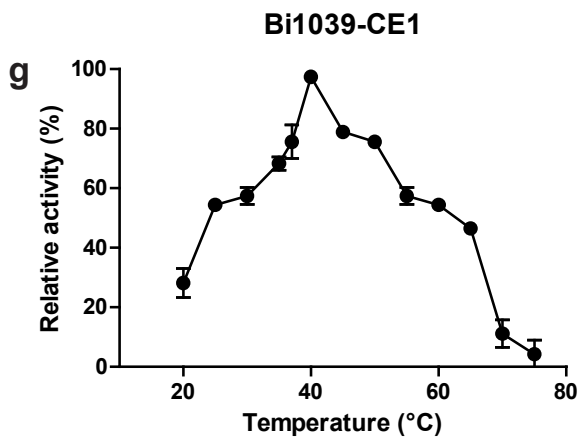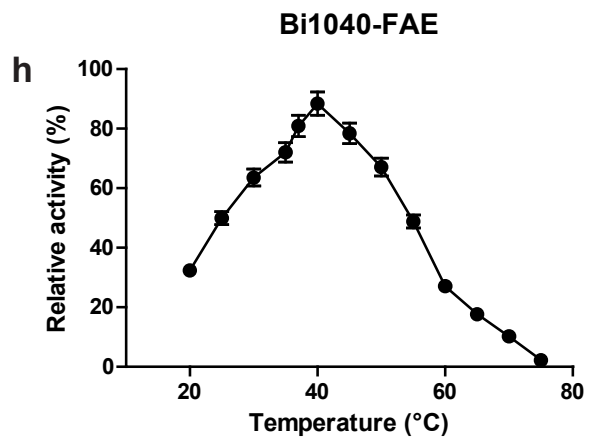

**Supplementary Fig. 7. Determination of the pH and temperature optima of the recombinant esterases from the *B. intestinalis* EGE PUL.** The enzymatic activity of each esterase was determined at different pH at 37 °C using two different buffers and *p*NP-acetate as substrate. The relative activities at different pH were then calculated as the percent of the highest obtained activity (**a**, **b**, **c**, and **d**). The optimal temperatures were then determined by incubating each enzyme at its respective optimal pH at temperatures ranging from 20 °C to 75 °C, and the relative activity was calculated relation to the highest activity obtained (**e**, **f**, **g**, and **h**). The graphs were plotted from the means  $\pm$  standard deviation of three independent reactions (n = 3). The source data underlying Supplementary Figs. 7a-h are provided in the Source Data file.

**a**

|            |                                                                |     |
|------------|----------------------------------------------------------------|-----|
| BeGH43/FAE | MKKQKTLTLLCNLFCCILLPLSAQKPATNPVIYADAPDMSMLRVGDTYYMSSTTMHMSPG   | 60  |
| Bi1040-FAE | -----                                                          | 0   |
| BeGH43/FAE | VPIMKSNLDLVNWKLVNAYDTLANIPTMNLDDGKNTYGRGSWASCLRYHEGVVYLSTFAQ   | 120 |
| Bi1040-FAE | -----                                                          | 0   |
| BeGH43/FAE | TTGKTYFYTTKLEKGPWKCTEFSPAYHDHSFFDEDDGHYIMYVGNKFLAEELKPDLSG     | 180 |
| Bi1040-FAE | -----                                                          | 0   |
| BeGH43/FAE | VKPGTERTVLIENASAPAGDNIMLGAEGSQLFKVNGKYLLFNITWPRGGVRTVIIVHRADKI | 240 |
| Bi1040-FAE | -----                                                          | 0   |
| BeGH43/FAE | TGPYEGRVVFQDRGIAQGGVLDTPDGRWFAYLFEDCGAVGRIPYLVVVEWKDGVVFLGVN   | 300 |
| Bi1040-FAE | -----                                                          | 0   |
| BeGH43/FAE | GRAPAKLELPDSRGLIPGIVASDDFNRRKGERALPLVWQWNHNPDNALWLSARKGYLRL    | 360 |
| Bi1040-FAE | -----                                                          | 0   |
| BeGH43/FAE | TTGRMETSFTQAKNLTQRTIGPVCTGVSVMDSVGMKEGDFAGLSLFQRKYQVGVKVTD     | 420 |
| Bi1040-FAE | -----                                                          | 0   |
| BeGH43/FAE | GKKYIVMVNGENETPAEVEKVLNQVVFKAACDFRNKDKGYFYSLDGSNWKATGNV        | 480 |
| Bi1040-FAE | -----MSLRFLNCLLFLNLRN-----                                     | 19  |
| BeGH43/FAE | LKMQYTPPHFMGYRFALFNATKEVGGADFDIKIEDKISDCRMBDICYADKLEGHKL       | 540 |
| Bi1040-FAE | -----LTFGVICALFVSPMSFGQITQWTDINYNANSLLEGHKL-----               | 58  |
| BeGH43/FAE | DIYLPDMDLPSYKVVVLIYGSAWFANNMKQAAFOVFGKSLLDKGFVAVVSINHRSSGDAKF  | 600 |
| Bi1040-FAE | DIYLPDGGTEYKVVVLIYGSAWFANNMKQAFQAMGKPLLDGFAVAVVSINHRSSGDAKF    | 118 |
| BeGH43/FAE | PAQINDVKAARFIRANAAKYRLDTSFIGITGFSSGGHSLASLAGTTNGVKSPTCAKTD     | 660 |
| Bi1040-FAE | PAQINDVKAARFIRAHADRYRLDTSFIGITGFSSGGHSLASLAGTTNGVKSPTCAKTD     | 178 |
| BeGH43/FAE | TEGNVGLYPSFSSRVDAVVWFGPIDMTRMENCNTTKGANSPPEALIGGVPAADNDMLAL    | 720 |
| Bi1040-FAE | TEGNVGDCTSFSSRVDAVVWFGPIDMTRMENCNTTKGANSPPEALIGGTPAHDNDMLAL    | 238 |
| BeGH43/FAE | LNPITYIDKNDPKFVIHGGADTVVPCQSTFFSALRAQGRLEEFISVPGGQHGPNFTFN     | 780 |
| Bi1040-FAE | LNPITYIDEKDPKFIHGGADTVVPCQSVFFKQTLSPKGRLEEFISVPGGQHGPNFTFN     | 298 |
| BeGH43/FAE | ENTLKKMIDFFAREAGTYRDLNR-----RPIKCDIK-----                      | 813 |
| Bi1040-FAE | ENTLKKMIDFFRKAAMDLCPANITLVPHIRPGSKKPPQKQFYTYL                  | 345 |

**b**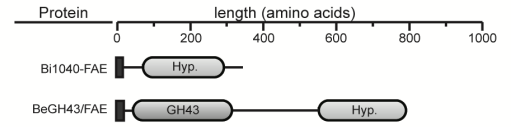**c**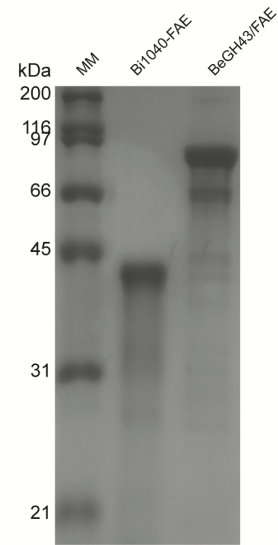**d**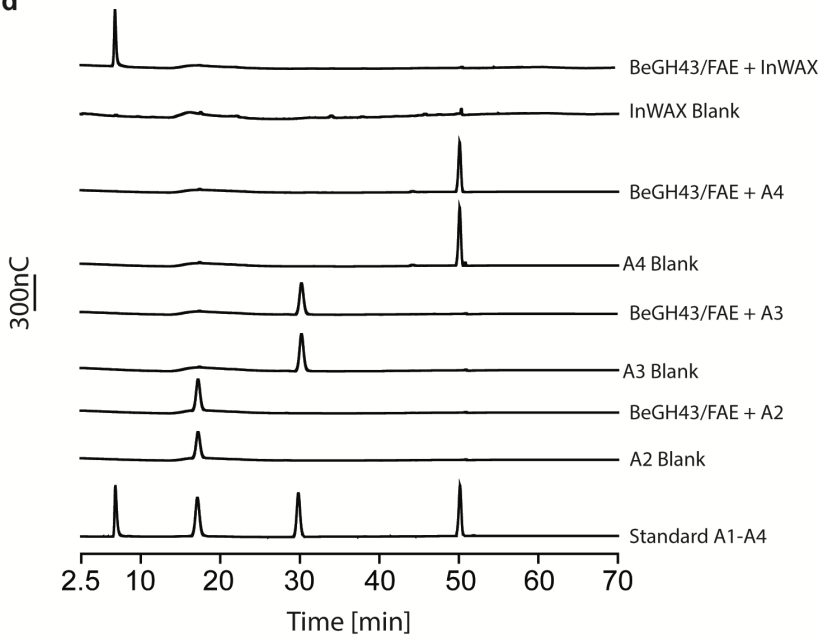**e**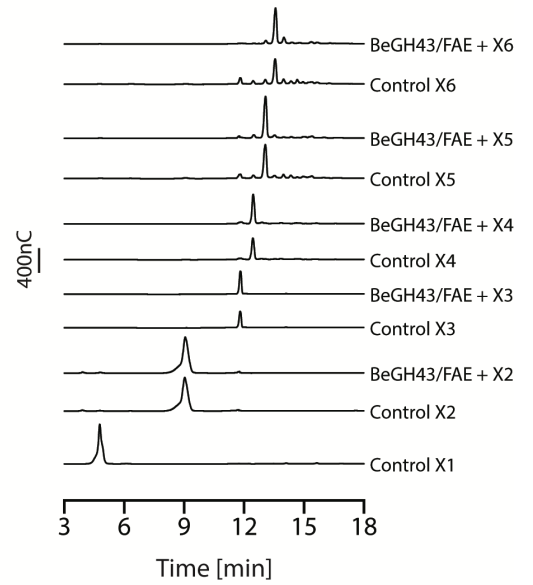

**Supplementary Fig. 8. Comparison of Bi1040-FAE and BeGH43/FAE demonstrate high conservation of the FAE module.** **a** The polypeptide sequence of the hypothetical protein (Bi1040), demonstrated as a ferulic acid esterase (FAE), aligned with BeGH43/Hyp showed high conservation of the C-terminal region of BeGH43/Hyp with Bi1040-FAE leading to designation as BeGH43/FAE. **b** A schematic showing the modular architectures of Bi1040-FAE and BeGH43/FAE. **c** A 12% SDS-PAGE analysis showing purified recombinant Bi1040-FAE and BeGH43/FAE. **d** HPLC chromatograms showing that BeGH43/FAE cleaves arabinose off insoluble arabinoxylan (InWAX) and not from arabino-oligosaccharides (A2, A3 or A4). **e** HPLC chromatograms showing that BeGH43/FAE does not hydrolyze xylo-oligosaccharides (X2, X3, X4, X5, and X6). The experiments in **d** and **e** were from single reactions. InWAX: insoluble wheat arabinoxylan; A2, A3, A4 are straight chain arabinobiose, arabinotriose and arabinotetraose, respectively; X2, X3, X4, X5, X6, xylobiose, xylotriase, xylo-tetraose, xylo-pentaose, and xylo-hexaose, respectively.

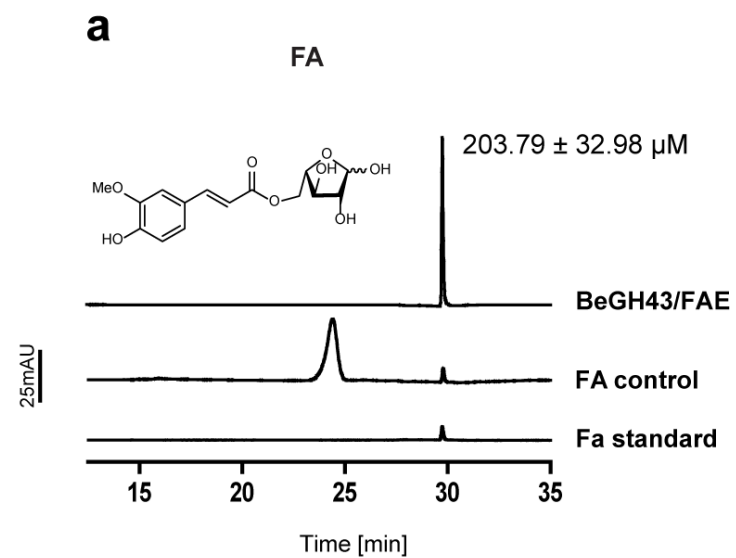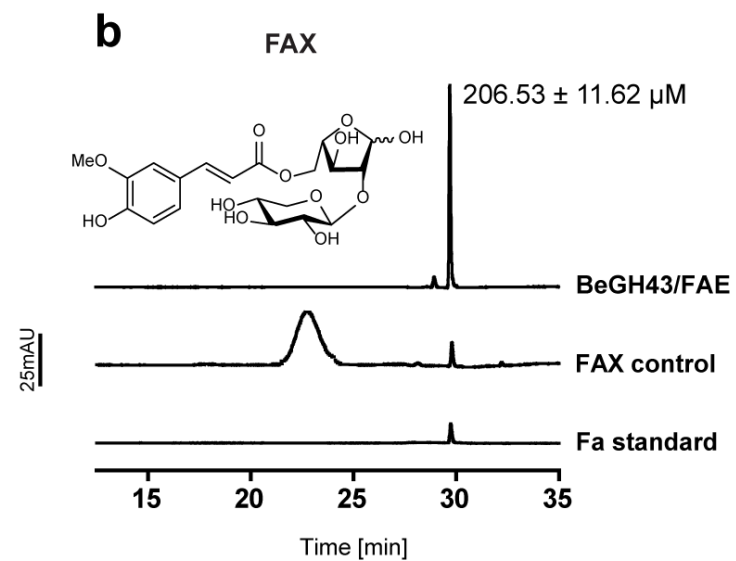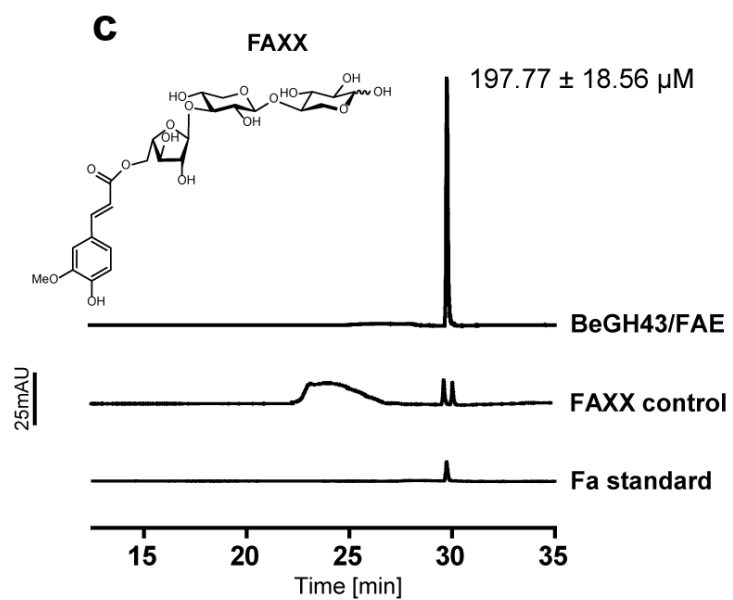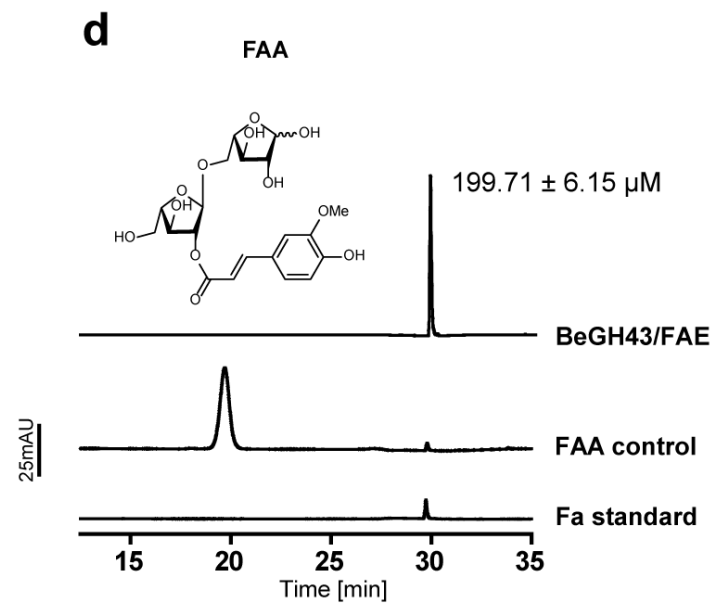



**Supplementary Fig. 9. Cleavage of ferulic acid from feruloylated oligosaccharides by BeGH43/FAE.** The hydrolytic reactions contained 50 nM of enzyme (BeGH43/FAE) with 200  $\mu$ M of the respective feruloylated oligosaccharide (with structure shown). **a** Incubated with FA (ferulic acid linked to arabinose). **b** Incubated with FAX (ferulic acid linked to a disaccharide of arabinose and xylose). **c** Incubated with FAXX (ferulic acid linked to a trisaccharide of arabinose and two xylose residues). **d** Incubated with FAA (ferulic acid linked to arabinobiose). All reactions were carried out for 10 minutes at 37 °C in a buffer of pH 6.5. The end products were analyzed by C18-HPLC, as described in the Methods section. Fa: ferulic acid. The y-axis is absorbance in milli-absorbance units (mAU). The results are presented as the mean  $\pm$  the standard deviation of three independent reactions (n=3), and the traces are representatives of the three different reactions. The source data underlying Supplementary Fig. 9 are provided in the Source Data file.

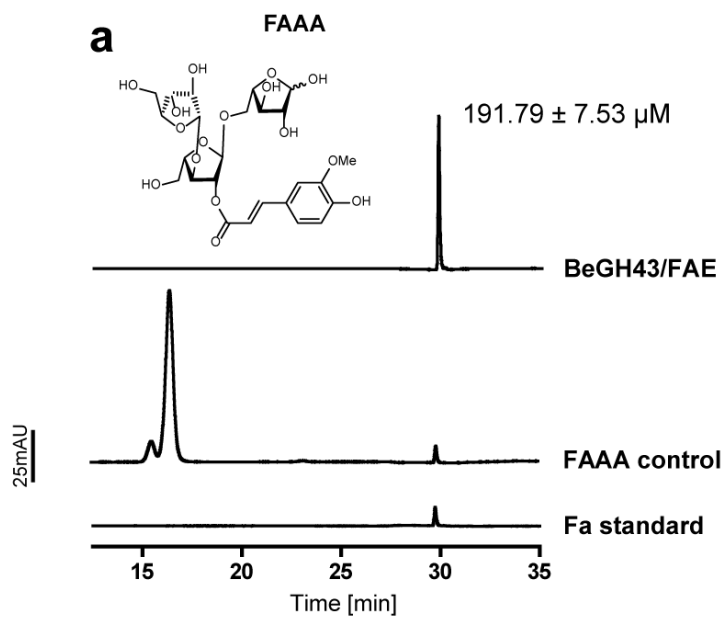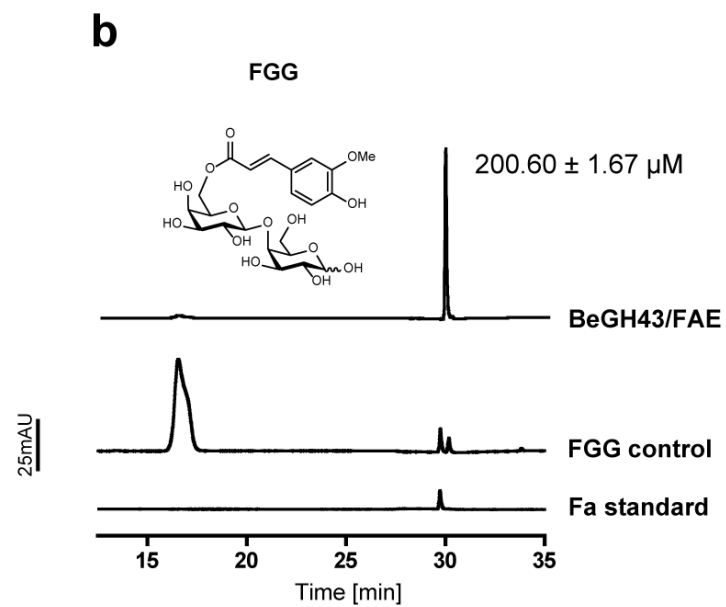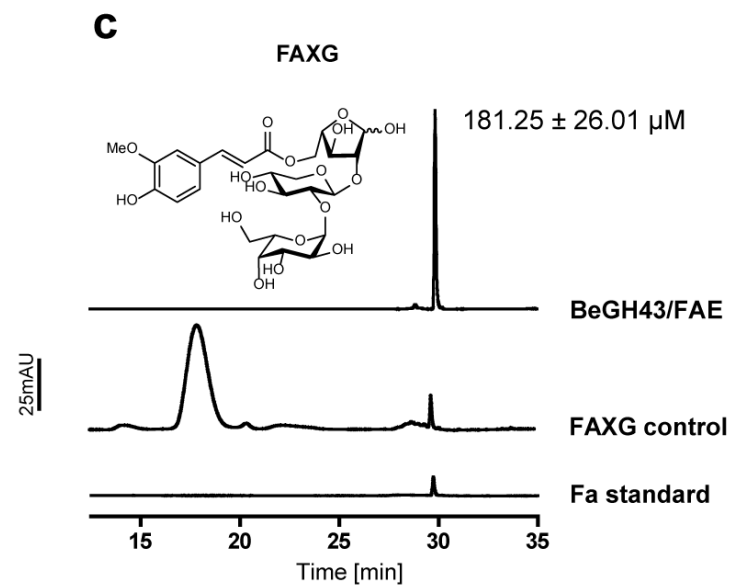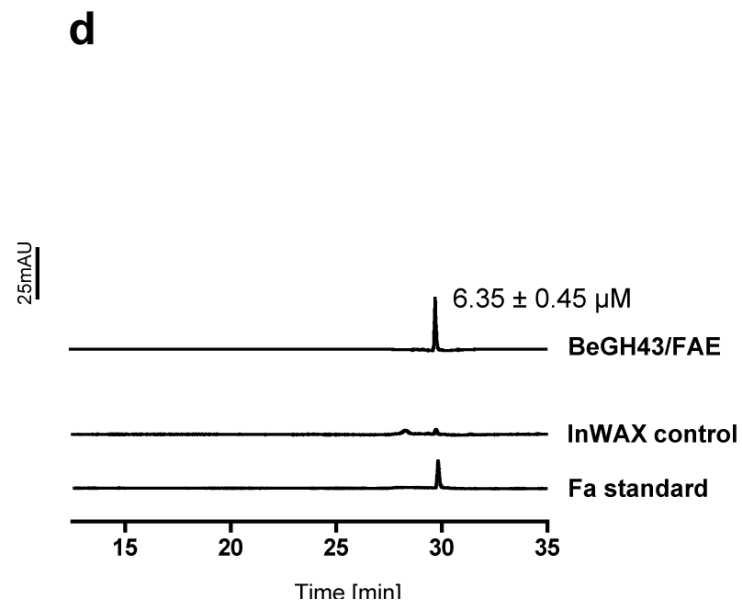

**Supplementary Fig. 10. Cleavage of ferulic acid from feruloylated oligosaccharides and InWAX by BeGH43/FAE.** The hydrolytic reactions contained 50 nM of enzyme (BeGH43/FAE) with 200  $\mu$ M of the respective feruloylated oligosaccharide (with structure shown). **a** Incubated with FAAA (ferulic acid linked to arabinotriose). **b** Incubated with FGG (ferulic acid linked to cellobiose or disaccharide of glucose). **c** Incubated with FAXG (ferulic acid linked to a trisaccharide of arabinose, xylose and glucose). **d** Incubated with InWAX (insoluble wheat arabinoxylan). All reactions were carried out for 10 minutes at 37 °C in a buffer of pH 6.5. The end products were analyzed by C18-HPLC, as described in the Methods section. Fa: ferulic acid. The y-axis is absorbance in milli-absorbance units (mAU). The results are presented as the mean  $\pm$  the standard deviation of three independent reactions (n=3), and the traces are representatives of the three different reactions. The source data underlying Supplementary Fig. 10 are provided in the Source Data file.

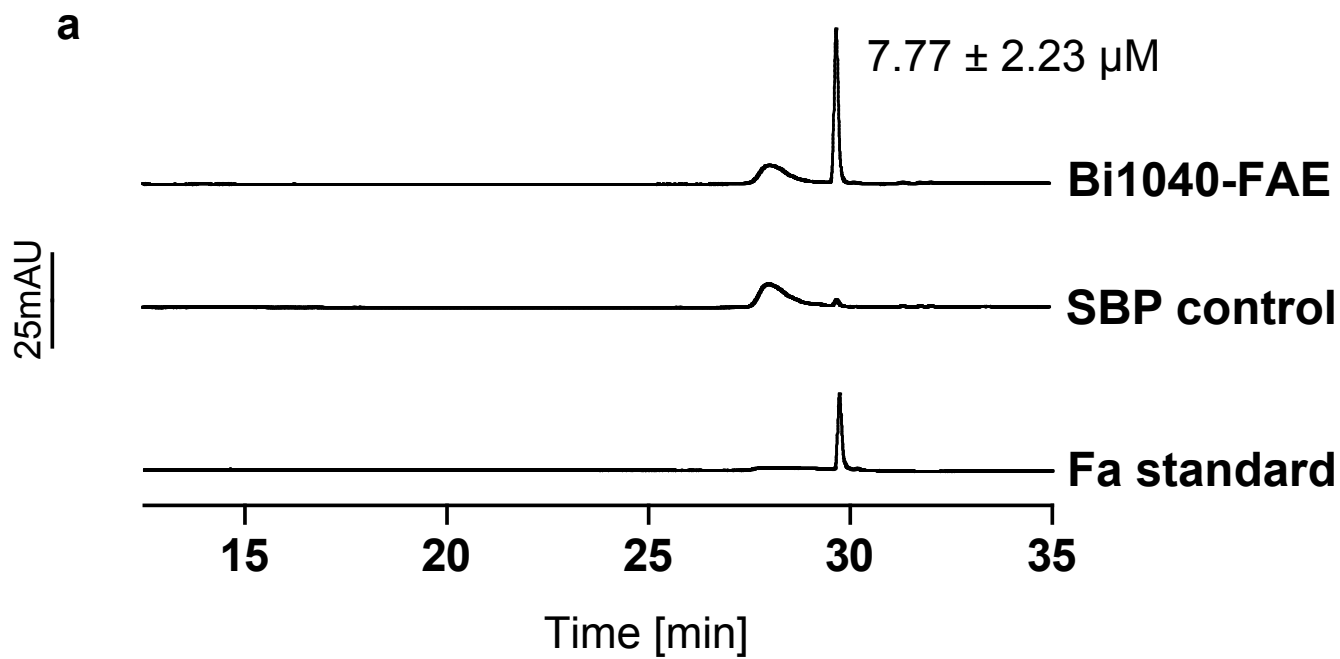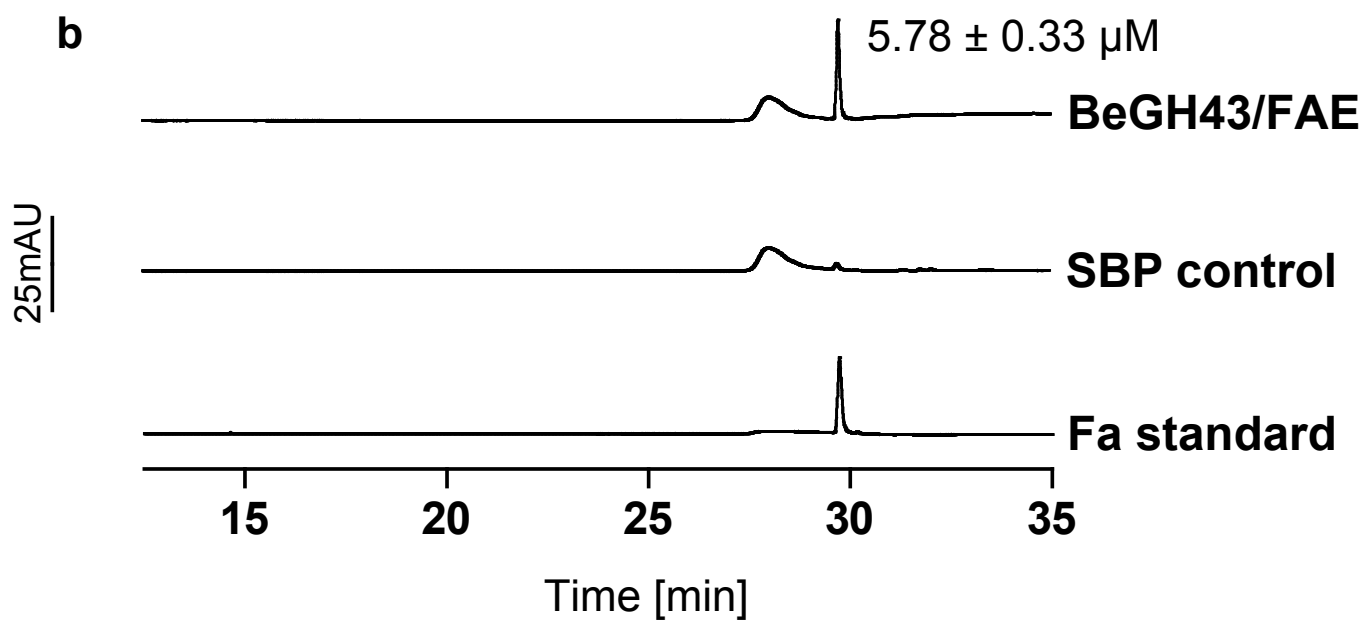

**Supplementary Fig. 11. Cleavage of ferulic acid from a natural substrate (sugar beet pulp).**

In substrates such as wheat bran, the ferulic acid is esterified to the C-5 position of arabinose in the arabinoxylyan, a  $\beta$ -1,4-D-xylan to which  $\alpha$ -L-arabinofuranosyl residues attached at position 2 or 3. By contrast, the feruloyl groups in sugar beet pulp are linked to the arabinofuranosyl residues of the main core of  $\alpha$ -1,5 linked arabinan chains and to the galactopyranosyl residues of the main core of the  $\beta$ -1,4-linked type I galactan chains<sup>1</sup>. The ferulic acid linkages in sugar beet pulp is therefore more complex than in wheat bran or wheat arabinoxylyan. Here, we assessed the versatility of the new ferulic acid esterase for the capacity to release ferulic acid from the more complex substrate sugar beet pulp. The reaction was carried out by incubating 50 nM of Bi1040-FAE or BeGH43/FAE with 0.5% of a naturally occurring substrate, sugar beet pulp, for 2 hours at 37 °C in a buffer of pH 6.5. The end products of hydrolysis were analyzed by C18-HPLC. **a** ferulic acid release by Bi1040-FAE. **b** Ferulic acid release by BeGH43/FAE. Fa: ferulic acid. SBP: sugar beet pulp. The y-axis is absorbance in milli-absorbance units (mAU). The results are presented as the mean  $\pm$  the standard deviation of three independent reactions (n=3), and the traces are representatives of the three different reactions. The source data underlying Supplementary Fig. 11 are provided in the Source Data file.

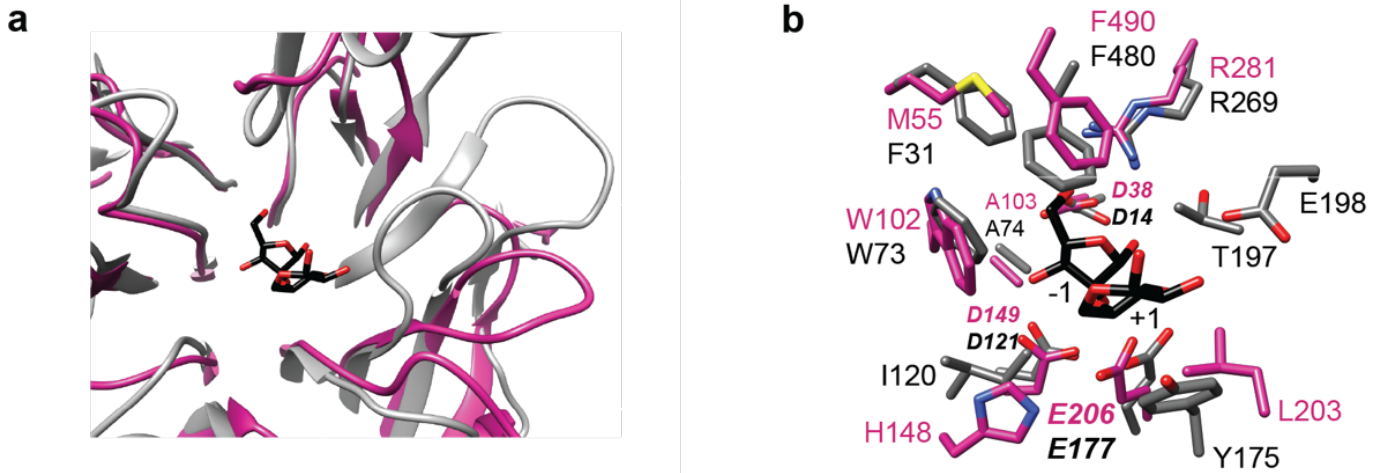

**Supplementary Fig. 12. Overlay of the dual function BeGH43/FAE N-terminal domain with the  $\beta$ 1,4-xylosidase (GH43) from *Geobacillus thermoleovorans*.** **a** Close up view of the overlay of the N-terminus of the BeGH43/FAE bifunctional enzyme (pink ribbon) with the structure of the  $\beta$ 1,4-xylosidase (GH43) from *Geobacillus thermoleovorans* Xyl enzyme (grey, PDB 5z5i, RMSD= 2.1Å for 454 residues) with bound arabinose and xylose. **b** Close up view of the residues coordinating arabinose (-1 subsite) and xylose (+1 subsite) in the *G. thermoleovorans* Xyl structure (grey and black). Residues within 3.5Å of the substrate are displayed for both structures.

a

|                       |                                                               |     |
|-----------------------|---------------------------------------------------------------|-----|
| SEH83175.1            | --MKTILSVMCC--LSAMAMAQPAGGFGG-FQAPQVKLETSSQEWKDVNYAGDDQAYHTC  | 56  |
| WP_006281679.1        | --MKKIALEMLLLLAGVTAQAQMPAGGFGG-FQMPQVKLETSSQEWKDVNYAGDNKTYHTC | 57  |
| WP_100993215.1        | --KNHGVFIAIILGL--LAQRVLA-----QPPDYASRAIQSSKSWLDLYVVDGIIGHKL   | 59  |
| WP_020527766.1        | --KTSWIIITFVGLILPITLSAQH-----LQNDYKSSSEIISLKHWDLDYVVDGRHIGHRL | 61  |
| WP_099150634.1        | --MRDLVLLL--FCL-ALGTGLS-----AQDQYQRMAIESSRAWLDIYVVDGRHIGHRL   | 49  |
| WP_013768612.1        | --MKKLAFAAFLASINLI GQAQT-----SPMDYNKTAIQSSKYWLDVYVVDGKIVGHRL  | 52  |
| WP_114463085.1        | --MKTLT--FFLT F ISFLAMAQP-----KEINA EKTAIVSSKHWLDIYVVDGMMGHRL | 50  |
| WP_015029998.1        | --MKK-TFILLFFCIKIFAQPKP-----DFAKSAIEASKSWLDIYVVDGIIGHKL       | 48  |
| WP_055151666.1        | --MKL-IYTLPLFLLLLFMAKAQN-----TPIPGPVESKAWLDLDYVVDGNHIGHKL     | 48  |
| WP_006799192.1        | -----MKN-----YILIVLFFLSLNCFGQEYSQSWKDVSYAGDSAIIYHRL           | 40  |
| WP_027452672.1        | --MKKLILSFMLLAMTIADYAQ-APG-----TMPFAMPQTNPDFKDVNYAGDTLEAHCL   | 51  |
| KQB43445.1            | -----MKK-----ITLILIFLCFNSFAQNANKKWLVDVNYANDAQVYHNL            | 40  |
| WP_071144936.1        | -----MR-----KLLL--I LMLIPAVCSFGQEABWLDIYVVDGTEGHKL            | 38  |
| WP_100615198.1        | -----MKK----NL-----LILILSALCFNSGFTQHAGKQWLDLNYANDEHTEHKL      | 42  |
| WP_123396545.1        | -----MKK----QLATLL----LLI---GA-MTIQAQSSAESQWLDIYVVDNTEGHKL    | 42  |
| WP_117741097.1        | LKMQYTMPHFMGYRFALFNATKETE GYVDFDYFKIEDKISDCRWADV CYADDELEGHKL | 540 |
| <b>WP_050793236.1</b> | LKMQYTMPHFMGYRFALFNATKEVGGYADF DYFKIEDKISDCRWEDICYADDKLEGHKL  | 540 |
| WP_024996568.1        | -----I-----LIF---AALFICAGSF-AQTQWTVNSYADDDLEGHKL              | 38  |
| WP_018709923.1        | -----MMAALASFGQTRPTDVTYANDTLVGHKL                             | 29  |
| <b>EDV05955.1</b>     | -----K-----LVFGFV CALFYSFMSFGQITQWTDIN YANDSLEGHKL            | 58  |
| WP_007216415.1        | -----K-----LVFGFV CALFYSFMSFGQITQWTDIN YANDSLEGHKL            | 39  |

|                       |                                                              |     |
|-----------------------|--------------------------------------------------------------|-----|
| SEH83175.1            | DIMLPKKEQASYPVVVLIYGSAWFSNNSKGMADLGTIVKSLLDAGFAVVCNHRSSMDAK  | 116 |
| WP_006281679.1        | DIMLPKPKQKNYPVVVLIYGSAWFSNNSKGMADLGTIVKSLLDAGYAVVCNHRSSSDAS  | 117 |
| WP_100993215.1        | DIHLPLSGKAPFPVLIICYGSAWLANNAKGAFTDGLGQRLIKEGFVAVAINHRSSGDTL  | 119 |
| WP_020527766.1        | DIHLPDKESDKYPVVVLSIYGSAWFSNNSKGAFAVIGQALIKAGYAVVTINHRASDAK   | 121 |
| WP_099150634.1        | DIHLPAEGEGPEPPIVLSIYGSAWFSNNSKATTFSTGLGQKLLAGGFVAVSINHRASDAL | 109 |
| WP_013768612.1        | DIHLPKKGRGYPYPIIVAIYGSAWFSNASKANIFQEGLGQALLINGFAVVSINHRSSDAK | 112 |
| WP_114463085.1        | DIHLPSVGKAPFPVIVVAIYGSAWFSNAAKGTVEFDGLGQTLINGFAVVSINHRSSDAK  | 110 |
| WP_015029998.1        | DIHLPNEGKGPFPVVVLIYGSAWFSNNTSKATCFNDGLGQTLIKNGFAVVSINHRSSDAI | 108 |
| WP_055151666.1        | DIHLPKKEGKGPFPVIVVLIYGSAWFSNNSKSGQLNDEGQTLIRNGYAVVSINHRSSDAI | 108 |
| WP_006799192.1        | DIMLPKVERNNYPVVVLIYGSAWFSNNGKADMT-TIGKALLDAGFAVVTINHRSSDAK   | 99  |
| WP_027452672.1        | DIMLPKKEGKAPYKVVIVAIYGSAWFANMMKPFAM-SLGKALTDAGYAVVSINHRSSDAK | 110 |
| KQB43445.1            | DIHLPKAEKTSYKVVIVVLIYGSAWFANMMKMAFQ-SMGKPLLDAGFAVVSINHRSSDAK | 99  |
| WP_071144936.1        | DIHLPPTGQSSYKAVVLIYGSAWFANMMKQIAFQ-AMGKTLIDGFAVVSINHRASMDAR  | 97  |
| WP_100615198.1        | DIHLPSEVKPKYKAVVLIYGSAWFANMMKQMAFQ-ALGKPLLDGFAVVSINHRSSGDAM  | 101 |
| WP_123396545.1        | DIMLPKSVKSDSYPAVVVLIYGSAWFANNAKMAFD-SMGKQLLDAGFAVVSINHRASGAK | 101 |
| WP_117741097.1        | DIMLPDTEGKSSHKVVVLIYGSAWFANMMKQNAFQ-VFGRSLLDKGFVAVSINHRSSDAK | 599 |
| <b>WP_050793236.1</b> | DIMLPDMDEPSYKVVVLIYGSAWFANMMKQAAAFQ-VFGKSLLDKGFVAVSINHRSSDAK | 599 |
| WP_024996568.1        | DIMLPDINQPSYKAVVLIYGSAWFANMMKQMAFQ-AMGKPLIDGFAVVSINHRSSDAK   | 97  |
| WP_018709923.1        | DIMLPDGNREKYKVVVLIYGSAWFANMMKQMAFQ-TMGRPLLDAGFAVVCANHRSSDAK  | 88  |
| <b>EDV05955.1</b>     | DIMLPDGGQTEYKVVVLIYGSAWFANMMKQMAFQ-AMGKPLLDGFAVVSINHRSSDAK   | 117 |
| WP_007216415.1        | DIMLPDGGQTEYKVVVLIYGSAWFANMMKQMAFQ-AMGKPLLDGFAVVSINHRSSDAK   | 98  |

(Trp563)

|                       |                                                               |     |
|-----------------------|---------------------------------------------------------------|-----|
| SEH83175.1            | WPAQIHDIKAVIRFVRGEAKKYKFDTKFIATSGFSSGGHLASTAATTSGTKQTKVGVTDI  | 176 |
| WP_006281679.1        | WPAQIHDIKAVIRFVRGEAKKYKFDPSFVATSGFSSGGHLASTAATTSGTKATKVGSDTI  | 177 |
| WP_100993215.1        | FPAQIHDVKAAIRFVRANAATESVTDQF IGITGWSGGHLASLAGTINHVKTKITIDGIEV | 179 |
| WP_020527766.1        | FPAQIQDVKAAIRFVRANALAESLDTSF IGITGWSGGHLASAFAGTANNITTFEFGNTI  | 181 |
| WP_099150634.1        | FPAQIQDVKAAIRFVRANAPSEDLDPAF IGITGWSGGHLASALTGTNNGIDSVSTEGEV  | 169 |
| WP_013768612.1        | FPAQIQDVKAAIRFVRANAPENLAPDF IGITGWSGGHLASALTGTANNVRKEVTQGEV   | 172 |
| WP_114463085.1        | FPAQIQDVKAAIRFVRANAAKESMDDSF IGITGWSGGHLASTALTGTNTTQTHSIHGLEV | 170 |
| WP_015029998.1        | WPAQIHDIKAAIRFVRANASVESLDTSF IGITGFSGGHLSIMAGVTSIGIKSTTINHLP  | 168 |
| WP_055151666.1        | WPAQIHDIKAAIRFVRANADQESLDRFLGIGYSSGGHLSIMAGVTSIGLEEFVIGGLEI   | 168 |
| WP_006799192.1        | FPAQINDVKAAIRFVRANASVYRLDTEFVIGISGGGNMAALAGTSRFAKQCTIIGNATV   | 159 |
| WP_027452672.1        | YPAQINDVKAAIRFVRANAKAYQLDTSF IGITGFSGGHLSSVAGVTNNLPKKTIDHGVSI | 170 |
| KQB43445.1            | YPAQINDVKAAIRFVRANAKKYNLDSSF IGITGFSGGHLASLAGTNGITNNTYVKKTI   | 159 |
| WP_071144936.1        | YPAQINDVKAAIRFVRANADKYHIDASFVIGITGFSGGHLSSLAGTNNVKEFTVGNVTL   | 157 |
| WP_100615198.1        | YPAQINDVKAAIRFVRANADYINIDASF IGITGFSGGHLASLAGTNGVKTFTVGEKTV   | 161 |
| WP_123396545.1        | FPAQIQDVKAAIRFVRANADKYHIDPSF IGITGFSGGHLSSLAGTNGVKTFTVGDVTV   | 161 |
| WP_117741097.1        | FPAQINDVKAAIRFVRANAAYKLDTSF IGITGFSGGHLASLAGTNGVKSYYTIGDKTV   | 659 |
| <b>WP_050793236.1</b> | FPAQINDVKAAIRFVRANAAYKLDTSF IGITGFSGGHLASLAGTNGVKSYYTIGAKTV   | 659 |
| WP_024996568.1        | FPAQINDVKAAIRFVRANAKEYKIDASF IGITGFSGGHLSSLAGATNGVKAYTVGNTTV  | 157 |
| WP_018709923.1        | FPAQINDVKAAIRFVRANAHAGEYRLDTMFGITGSSGGHLAALAGTNDVGVYRVDGSEM   | 148 |
| <b>EDV05955.1</b>     | FPAQINDVKAAIRFVRANAHADYRLDTSF IGITGFSGGHLSSLAGTNGVKVYKVGDTM   | 177 |
| WP_007216415.1        | FPAQINDVKAAIRFVRANAHADYRLDTSF IGITGFSGGHLSSLAGTNGVKVYKVGDTM   | 158 |

(Ser634)

|                       |                                                                |     |
|-----------------------|----------------------------------------------------------------|-----|
| SEH83175.1            | DIEGNVGNVYLNSSSVNAACDWSGPIDLTAMICGESM---KMGENSPEVDVILNSKLAKEP  | 233 |
| WP_006281679.1        | DIEGNLGOYTQESSQVNAACDWSGPIINLMNMICGHHI---TMGKDSPEDIMLRSKLDEP   | 234 |
| WP_100993215.1        | DIEGHLGPEFTPVSSHVNAVVDWFGPTNFLLMISCDPR-MHHNDPRSPESSLIGGGITQHT  | 238 |
| WP_020527766.1        | DIEGSLGNHTSFSSQVDAVVDWFGPTNFLVMDNCGST-MKHDNDTSPSSLYGGAIQSNK    | 240 |
| WP_099150634.1        | NIEGSLGKFTDSDSQQVAVVDWFGPTDFLIMTICGSS-FSHDKPKSPSSLYGGPIQINP    | 228 |
| WP_013768612.1        | DIEGALCKHLTSSAIDAVVDWFGPTDFLKMDDCGSS-FSHNDAKSPSSLYGGPIQINP     | 231 |
| WP_114463085.1        | DIEGSLGKHTQTSSKVNNAVVDWFGPTDFLIMDCGSS-FAHNEAKSPSSLYGGAIQINP    | 229 |
| WP_015029998.1        | DIEGNIIGKSLGESSNVDAVVDWFGPTDFLLMACGSS-FSHNEAKSPSTLIGGAIQINP    | 227 |
| WP_055151666.1        | SIDNKIGKHPEDSSVDAVVDWFGPTDFLIMISCGSS-FSHDGAISPESTLVGGPIQINP    | 227 |
| WP_006799192.1        | DMEGIGPVTQFSSQVDAVVDWFGPTNMLVMSCGGTDFIHNPNSFAAYIGGGPIQINP      | 219 |
| WP_027452672.1        | DIEGKVGDCLNSSRVDAVVDWFGPTDMAHMKCTIT---NDDKSPSAALIGGDPKPKMS     | 226 |
| KQB43445.1            | NIEGNIIGENTSSASKVDAVVDWFGPVNLALMAACEKP---KDEKSPSAALIGGNPAINL   | 215 |
| WP_071144936.1        | DIEGNLCAVTNYSSRVDAVVDWFGPTDMTMMKCKGV---NDEKSPSAALIGGAPAINL     | 213 |
| WP_100615198.1        | DIEGDLIGNYTQVSSAVDAVVDWFGPTDFTRMENCNTIT---KDDKSPSAALIKGNPAINL  | 217 |
| WP_123396545.1        | DIEGNLGDYTSASSDVNAVVDWFGPTDMSRMENCNTIT---KADSPEAMLIGGAPAINL    | 217 |
| WP_117741097.1        | DIEGNVGEYFSSSRVDAVVDWFGPTDMTRMENCNTIT---KGANSPSAALIGGIPAINL    | 715 |
| <b>WP_050793236.1</b> | DIEGNVGLYPSFSSRVDAVVDWFGPTDMTRMENCNTIT---KGANSPSAALIGGIPAINL   | 715 |
| WP_024996568.1        | DIEGSLVCAVGSFSSDVDAVVDWFGPTDMTRMENCNTIT---KADSPEAALIGGAPAINP   | 213 |
| WP_018709923.1        | DIEGKVGDCLAHSSRVDAVVDWFGPTDMTRMENCSTIT---KGS DSPSAALIGGNPASHL  | 204 |
| <b>EDV05955.1</b>     | DIEGNVGDCTSFSSRVDAVVDWFGPTDMTRMENCATIT---KADSPEAALIGGTPAASHM   | 233 |
| WP_007216415.1        | DIEGNVGDCTSFSSRVDAVVDWFGPTDMTRMENCATIT---KGV DSPSAALIGGTPAASHM | 214 |

(Glu703)

|                       |                                                               |     |
|-----------------------|---------------------------------------------------------------|-----|
| SEH83175.1            | DKYLSLSANTYVDK--NDPPIIFHGEKDNVVPCCQKGAFFETLKAGVKTEATFVEBGS    | 291 |
| WP_006281679.1        | DKYKLSLSATYVDK--NDPPIIFHGEKDNVVPCCQKGEFYEVLLKAGVKTEATFVEKGE   | 292 |
| WP_100993215.1        | SRVELANPIITYYSK--ASPPFLIHGDKDPLVPHCQSEELANKLQEGVKSLLIQVSGGR   | 296 |
| WP_020527766.1        | NKCHLADPVTYYSK--NATPFLIHGDKDPLVPHCQSEYLYEKLNESDIYCEFIIVEGGK   | 298 |
| WP_099150634.1        | LKCLLANPIHYATA--NPPFLLFHGDQDPLVPHCQSEKLLHQIQRRQAPSELVIIVEGGK  | 286 |
| WP_013768612.1        | VKVATANPIISYVK--SNPPFLLFHGDKDPLVPHCQSOLLFEQLQAAGVSSKLVIIIEGG  | 289 |
| WP_114463085.1        | DKCALANPIISYVNA--QPPFLLFHGDKDPLVPHCQSEKLYEALQKNVKSLLIIIEGGG   | 287 |
| WP_015029998.1        | EKVLANPIISYYSK--ATPPFLLFHGDKDPLVPHCSEKLYEKMQKGVKSELIIIEGGG    | 285 |
| WP_055151666.1        | AKVALANPIISYVK--ENPPMLFHGTADPLVPHCSEKLYEAQQKAGAVSRLVIVEGGG    | 285 |
| WP_006799192.1        | DKCLLASPTTYIDS--SDPPFLLFHGDKDRVVPHCQSELLFEALQKAGVPSRFYLVSGGQ  | 277 |
| WP_027452672.1        | EMVSLISPIDYAEAPDCPRFLIHGDSDTVVPHCQSENFAAVLKAGKLVDFIIVEKGG     | 286 |
| KQB43445.1            | DMINLLSPTTYIDK--TDPDFLLIHGDADSVVPYQCSVLFAKSLKKGKLVDFIIVEKGG   | 273 |
| WP_071144936.1        | DMLALLNPMTYIDK--TDPKFLIHGDSDNVVPHCQSEFFSAALKYGLLDDFIIVEAGGQ   | 271 |
| WP_100615198.1        | DMLALLNPMTYIDN--KDPQFLIHGDADNVVPHCQSVFFSNLKDGLNEFIIVEBGGQ     | 275 |
| WP_123396545.1        | DMIKLLNPMTYIDA--NDPKFIVIHGDADPVVPYQSEYFAEALKKNGNLNEFIIVEBGGQ  | 275 |
| WP_117741097.1        | DMLALLNPMTYIDK--NDPKFIVIHGEADTVVPNCQSIFFSEALRAQGRLEEFIVSVEGGQ | 773 |
| <b>WP_050793236.1</b> | DMLALLNPMTYIDK--NDPKFIVIHGEADTVVPNCQSIFFSEALRAQGRLEEFIVSVEGGQ | 773 |
| WP_024996568.1        | EMLALLNPMTYIDV--KDPKFLIHGDADTVVPNCQSIYFSALKKAGLLEEFIVSVEGGQ   | 271 |
| WP_018709923.1        | DMLALLNPMTYIDS--ADPEFLIHGDADPVVPYQSLFFKEALDEKGLAEFIVVEKGE     | 262 |
| <b>EDV05955.1</b>     | DVLTLLNPMTYIDE--KDPKFLIHGDADTVVPHCQSVFFKDTLSAKGRLEEFIVVEQGG   | 291 |
| WP_007216415.1        | DVLTLLNPMTYIDE--KDPKFLIHGDADTVVPHCQSVFFKDALSAKGRLEEFIVVEQGG   | 272 |

(Asp742)

|                       |                                                         |     |
|-----------------------|---------------------------------------------------------|-----|
| SEH83175.1            | HGGPAMYVEENIQKMNFLKALL-----                             | 314 |
| WP_006281679.1        | HG-MNMYDEENIKKMTDFLNRVRKGG-----                         | 317 |
| WP_100993215.1        | HG-PGVLSSESYTKMVSFFTTWKQVKN-----                        | 323 |
| WP_020527766.1        | HG-PGVLIPEYIQQMIFFDKIRIDK-----                          | 323 |
| WP_099150634.1        | HG-PGVMIPEYDQMVAFQKHAMGK-----                           | 311 |
| WP_013768612.1        | HG-PGVLIPEYEQMIQFFKGLKSK-----                           | 314 |
| WP_114463085.1        | HG-PGVMIPEYQKMAVFFKGLGKVKK-----                         | 314 |
| WP_015029998.1        | HG-PGVMIPEYVQMITFFFSKIKK-----                           | 309 |
| WP_055151666.1        | HG-PGVMIPEYDEMVAFFNQKSKNLTR-----                        | 313 |
| WP_006799192.1        | HG-PGVHVPENIKLMTDFVSVCKERKYLK-----                      | 305 |
| WP_027452672.1        | HG-PITFNENTFKKMVEFFKAEKK-----                           | 310 |
| KQB43445.1            | HG-PVTFNEETFKKMTDFFLKAEKK-----                          | 298 |
| WP_071144936.1        | HG-PVTFNEETHSKMTEFFFLKAGMQ-----                         | 296 |
| WP_100615198.1        | HG-PATFNENTFKKMSDFFLTAKKK-----                          | 300 |
| WP_123396545.1        | HG-PVTFNEETFKKMTDFVVEARQVVTGK-----                      | 303 |
| WP_117741097.1        | HG-PVTFNEETFKKMTDFFAKAGM-----                           | 797 |
| <b>WP_050793236.1</b> | HG-PVTFNEETFKKMTDFFARAGIYRDLNRIRPKC---DDIK-----         | 813 |
| WP_024996568.1        | HG-PVTFNEATFKKMTDFVVKSK-----                            | 294 |
| WP_018709923.1        | HG-PVTFNEQTFKKMTDFFRMAGMD-----                          | 287 |
| <b>EDV05955.1</b>     | HG-PITFNEQTFKKMTEFFFRKAAMDLCPANITLVPHIRPGSKKNPPQKQFYTTY | 345 |
| WP_007216415.1        | HG-PITFNEQTFKKMTEFFFRKAAMDLCPANITLVPHIRPGSKKNPPQKQFYTTY | 326 |

(His774)



**b**

PZX17224.1 -----MIVNNLKIILSM--AIAMVMGNITFAQTAKVNDDFKPSSEVNVQPGKLYFQVN 48  
WP\_117954567.1 -----MAMKRIITLFGAF--ALLTNLNSFSYAQALDFKPSVSNVQIGKAYFQVN 47  
**WP\_007661004.1** -----MKKQILFWSMM--SWMVSVGLPSFAQTVEDFKPSSEVNVQPGKLYFQVN 45  
WP\_007216414.1 -----MKKQILFWSMM--SWMVSVGLPSFAQTVEDFKPSSEVNVQPGKLYFQVN 45  
WP\_123120797.1 -----MNY--KRFIFFAATFLLGASCFA-----QSDGFKPSATNAPGKQYFQVS 42  
WP\_066034169.1 -----MRLSIN--AVIAIFS---LYFQSVNAQSEQIITEDFKPSAANQBERITFQVN 47  
WP\_055090457.1 -----MNYK--RIIYLTFV--CSVTISLAQTKTQEVLEDFKPSVSNVQCGKLYFQVN 47  
WP\_035660712.1 -----MNFK--SILFSVNV--LASICTAQTNQIKVLEDFKPSVSNVQCGKLYFQVN 47  
WP\_083552732.1 -----MNYK--SIYLVSI--MTTIGIGQTNPLKVTEDFKPSVSNVQCGKLYFQVN 47  
WP\_066330097.1 -----MKVN--SIVFVIT--ISNTSFSQSVSSNVVDFVPSVSNVQCGKLYFQVN 47  
WP\_068704550.1 -----MNIKHIFIAFVAA-----AFCQMAPAQTVVDFKPSVSNVQPGKLYFQVN 44  
WP\_020531203.1 MDFLKLNLMTSKINHRYILFLI---GFMLTGVICFAQSEVDFKPSVSNVQPGKLYFQVN 57  
WP\_016778581.1 -----MKYIQSLLVIFALFIGSIATAQTDKVDFKPSVSNVQCGKLYFQVN 46  
WP\_106153941.1 -----MRYIHLLIILF--LLSSNFVTAQTEKVKEDFKPSVSNVQIGKLYFQVN 45  
WP\_053183372.1 -----MKHFLILIALFVLSATNLVLAQTSKAITEDFKPSSEVNVQPGKLYFQVN 46  
WP\_045027037.1 -----MKNTFVLI AALFIG---ICTAQDVVDFKPSVSNVQPGKLYFQVN 42  
WP\_038555069.1 -----MKNIVILIAALFIG---ICTAQDVVDFKPSVSNVQPGKLYFQVN 42

PZX17224.1 SGGCVRVQISAPDAKMQVLDIGGVYTNLVKDGNGLWTGESAPQDEGFHYYQINVDGASVF 108  
WP\_117954567.1 SEGRVRAQIYAPDAKRVQVLDIGGVYDMTKNEQGFWTGESERQDEGFHYYQINVDGASVF 107  
**WP\_007661004.1** SERKVRVQISAPDAKRVQVLDIGGVYDMTKDEKGVWTGESAPQDEGFHYYQINVDGAAVF 105  
WP\_007216414.1 SERKVRVQISAPDAKRVQVLDIGGVYDMTKDEKGVWTGESAPQDEGFHYYQINVDGAAVF 105  
WP\_123120797.1 ADGRVRASIVAPDAHNQVLDIGGVYDMTKDEKGVWTGESLPQDEGFHYYQINIDGVSVF 102  
WP\_066034169.1 SORRVRASISAPNASKVQVLDIGGVYDMRKDKGVWTGESNPQDEGFHYYQINIDGASVF 107  
WP\_055090457.1 SGRVRANILAPDAKRVQVLDIGGVYDMVKDAKGLWTGESLPQDEGFHYYQINIDGASVF 107  
WP\_035660712.1 SERRVRASILAPDAKRVQVLDIGGVYDMVKDEKGLWTGVSENPQDEGFHYYQINIDGASVF 107  
WP\_083552732.1 SGRVRASILAPDAKRVQVLDIGGVYDMVKDKGLWTGVSENPQDEGFHYYQINIDGASVF 107  
WP\_066330097.1 SERRVRASILAPDAKRVQVLDIGGVYDMVKDKGLWTGVSNPQDEGFHYYQINIDGASVF 107  
WP\_068704550.1 SEGRVRSIPAPNAQVQVLDIGGVYDMKDKGVWTGESAPQVEGFHYYQINVDGASVF 104  
WP\_020531203.1 SERRVRASIAAPANLVQVLDIGGVYDMTKDNGVWTGESAPQDEGFHYYQINIDGASVF 117  
WP\_016778581.1 SEGRVVRIEAPDAKRVQVLDIGGVYDMTKDNGVWTGESAPQDEGFHYYQINIDGASVF 106  
WP\_106153941.1 SEGRVVRIEAPGANNVQVLDIGGVYDMTKDNGVWTGESSENPQDEGFHYYQINIDGASVF 105  
WP\_053183372.1 SEGRVRAQISAPDAKRVQVLDIGGVYDMVKDEDGVWTGESAPQDEGFHYYQINIDGASVF 106  
WP\_045027037.1 SEGRVRAQIILAPDAKRVQVLDIGGVYDMVKDENGVWTGESSENPQVGFHYYQINVDGASVF 102  
WP\_038555069.1 SEGRVRAQISAPGANNVRLDIGGVYDMVKDENGVWTGESSENPQVGFHYYQINIDGASVF 102

PZX17224.1 DPGSRVYFYGAGRWGSGTEIPADDSHIFALQDVPHGLVSELNLYFSKHTGLMRRRCFVYTPAG 168  
WP\_117954567.1 DPGTKYFYGAGRWGSGTEIPAHDFYALKDVPHGLVSELNLYSKHTQSWRRRCFVYTPAG 167  
**WP\_007661004.1** DPGTYFYGAGRWGSGTEIPAHDAFYALKDVPHGLLSEMNYSNLTKAWRRRCFVYTPAG 165  
WP\_007216414.1 DPGTYFYGAGRWGSGTEIPAHDAFYALKDVPHGLLSEMNYSNLTKAWRRRCFVYTPAG 165  
WP\_123120797.1 DPGTYFYGAGRWGSGTEIPASDQDFYALKDVPHGLVSENIYFSKHTNSWRRRCFVYTPAG 162  
WP\_066034169.1 DPGTYFYGAGRWGSGTEIPSSDQDFYALKDVPHGLVSENIYFSKHTNSWRRRCFVYTPAG 167  
WP\_055090457.1 DPGTYFYGAGRWGSGTEIPAHDFYALKDVPHGLVSENIYFSKHTNSWRRRCFVYTPAE 167  
WP\_035660712.1 DPGTYFYGAGRWGSGTEIPAHDFYALKDVPHGLVSENIYFSKHTNSWRRRCFVYTPAN 167  
WP\_083552732.1 DPGTYFYGAGRWGSGTEIPASDQDFYALKDVPHGLVSENIYFSKHTNSWRRRCFVYTPAN 167  
WP\_066330097.1 DPGTYFYGAGRWGSGTEIPASDQDFYALKDVPHGLVSENIYFSKHTNSWRRRCFVYTPAN 167  
WP\_068704550.1 DPGTYFYGAGRWGSGTEIPAHDFYALKDVPHGLVSENIYFSKHTNSWRRRCFVYTPAE 164  
WP\_020531203.1 DPGTYFYGAGRWGSGTEIPAHDFYALKDVPHGLVSENIYFSKHTNSWRRRCFVYTPAE 177  
WP\_016778581.1 DPGTYFYGAGRWGSGTEIPAHDFYALKDVPHGLVSENIYFSKHTNSWRRRCFVYTPAG 166  
WP\_106153941.1 DPGTKYFYGAGRWGSGTEIPAHDFYALKDVPHGLVSENIYFSKHTNSWRRRCFVYTPAG 165  
WP\_053183372.1 DPGTKYFYGAGRWGSGTEIPAHDFYALKDVPHGLVSENIYFSKHTNSWRRRCFVYTPAG 166  
WP\_045027037.1 DPGTKYFYGAGRWGSGTEIPADDRNFYALKDVPHGLVSENIYFSKHTNSWRRRCFVYTPAE 162  
WP\_038555069.1 DPGTYFYGAGRWGSGTEIPAKMDNFYALKDVPHGLVSENIYFSKHTNSWRRRCFVYTPAE 162

PZX17224.1 YEADANMRYPVLYLQHGSEFDETGWICOGKANLIDLNLIAHKAIPMIIVMDNGYAKPL 228  
WP\_117954567.1 YEVNTERYPVLYLQHGSEFDETGWISOGKANLIDLNLIAAKKAVPMIIVMDNGYAKRPS 227  
**WP\_007661004.1** YGDNKDKRYPVLYLQHGSEFDETGWIFROGKTNLIDLNLIAAGKAVPMIIVMDNGYAKPG 225  
WP\_007216414.1 YGDNKDKRYPVLYLQHGSEFDETGWIFROGKTNLIDLNLIAAGKAVPMIIVMDNGYAKPG 225  
WP\_123120797.1 YEKDAKTRYPVLYLQHGSEFDETGWISOGKANLIDLNLIASGKAVPMIIVMDNGYAKPS 222  
WP\_066034169.1 YNENTKTRYPVLYLQHGSEFDETGWISOGKANLIDLNLIAAKKAVPMIIVMDNGYAKAC 227  
WP\_055090457.1 YFONQDKRYPVLYLQHGSEFDETGWISVOGKANLIDLNLIAAKKANPMIIVMDNGYAKPC 227  
WP\_035660712.1 YNEBSKTRYPVLYLQHGSEFDETGWAVOGKANLIDLNLIASKKAVPMIIVMDNGYAKPC 227  
WP\_083552732.1 YNENTKTRYPVLYLQHGSEFDETGWAVOGKANLIDLNLIASKKANPMIIVMDNGYAKPC 227  
WP\_066330097.1 YNTDKTRYPVLYLQHGSEFDETGWAVOGKANLIDLNLITSKKAVPMIIVMDNGYAKPC 227  
WP\_068704550.1 YDKNPSKRYPVLYLQHGSEFDETGWPTOGKANLIDLNLIAAKKAVPMIIVMDNGYAKAN 224  
WP\_020531203.1 YENDNAKRYPVLYLQHGSEFDETGWISOGKANLIDLNLIAEKKAVPMIIVMDNGYAKPC 237  
WP\_016778581.1 YHRDLKRYPVLYLQHGSEFDETGWISNOGHANLIDLNLIAENKAVPMIIVMDNGYAKAC 226  
WP\_106153941.1 YYEDINKRYPVLYLQHGSEFDETGWISOGKANLIDLNLIAEKKAVPMIIVMDNGYAKAC 225  
WP\_053183372.1 YETSTDKRYPVLYLQHGSEFDETGWPCOGKANLIDLNLIAEKKAVPMIIVMDNGYAKPH 226  
WP\_045027037.1 YTNPKDKRYPVLYLQHGSEFDETGWPCOGKANLIDLNLIAAKKAVPMIIVMDNGYAKPC 222  
WP\_038555069.1 YNANPKQYPVLYLQHGSEFDETGWASOGHANLIDLNLIAAKKAVPMIIVMDNGYAKPC 222

|                       |                                                                 |     |
|-----------------------|-----------------------------------------------------------------|-----|
| PZX17224.1            | A--SADGNARPASVFEEVMMQEIIPIDSEFRTLVVHRDHRATAGLSMGANQTMRIAMNHL    | 286 |
| WP_117954567.1        | EQT-----PFQITVFEEVLMQEMIPMIDKFKRTLIPNRESRAIAGLSMGANQTMRIAMNHP   | 282 |
| <b>WP_007661004.1</b> | EKS-----PFAASIFEEVLMNEVIMPIDAKFRTLSGREDRATAGLSMGANQTMRIAMNHP    | 280 |
| WP_007216414.1        | EKS-----PFAASIFEEVLMNEVIMPIDAKFRTLSGREDRATAGLSMGANQTMRIAMNHP    | 280 |
| WP_123120797.1        | DNP-ADSKTRPQFVFEEVMMINEVIMPIDGKFKRTLIPNREHRAIAGLSMGANQTMRIIMNHL | 281 |
| WP_066034169.1        | EENS-SDKNPKBSVFELVLIITFIMPIDAKFRTIPKRENRAIAGLSMGANQTMRIIMNHL    | 286 |
| WP_055090457.1        | TNG-----ERQBSVFEEVLINEIIPMIDAKFRTLANRENRAIAGLSMGANQTMRIIMNHL    | 282 |
| WP_035660712.1        | SND-----SRQBSVFEEVVIQEIIPMIDTKFKRTLIPNRENRAIAGLSMGANQTMRIIMNHL  | 282 |
| WP_083552732.1        | SGT-----ARQBSVFEEVLINEIIPMIDAKFRTIPNRENRAIAGLSMGANQTMRIIMNHL    | 282 |
| WP_066330097.1        | TNG-----ARQBSVFEEVLINEIIPMIDAKFRTIPNRENRAIAGLSMGANQTMRIIMNHL    | 282 |
| WP_068704550.1        | A---SAPSKSAFFPFEVMMINEIIPMIDASFRTLSDREHRAIAGLSMGANQTITITMNNL    | 280 |
| WP_020531203.1        | NLENADRRGRPASAFEEVMTTEIIPMIDTEFRTLKDKREHRAIAGLSMGANQTMRIIMNHL   | 297 |
| WP_016778581.1        | E--N-GITGRPAMVFEEVMMQEIIPMIDAFRTIPNRENRAIAGLSMGANQTMRIAMNHL     | 283 |
| WP_106153941.1        | D--K-DKGRPAMVFEEVMMQEIIPMIDAFRTIPNRENRAIAGLSMGANQTMRIAMNHL      | 282 |
| WP_053183372.1        | E--NSDCNSRPVSVFEEVMTSEIIPMIDAFRTILDRKHRAIAGLSMGANQTMRIIMNHL     | 284 |
| WP_045027037.1        | T--S--CGGRPAMVFEEVMMINEIIPMIDNRFRTIADREHRAIAGLSMGANQTMRIAMNHL   | 278 |
| WP_038555069.1        | S--S--CGGRPAMVFEEVMMINEIIPMIDKFKFRTIADREHRAIAGLSMGANQTMRIAMNHL  | 278 |

(Ser226)

|                       |                                                                  |     |
|-----------------------|------------------------------------------------------------------|-----|
| PZX17224.1            | DFFAFYGGFSGTANYPSPAQPIVDVTFLDGKFKNGSWNQQLLWLG/GTKKEPVFKS         | 346 |
| WP_117954567.1        | EAFAYYGGFSGTSNYPSTEPIDADTFLGGKFKDGAANKQKSF/FLGLGTSE/PAPFPGVV     | 342 |
| WP_007661004.1        | GHFAYYGGFSGTSNYPSTEPIDATFLNGKFKDAKAVNQEFKVF/FLGLGTAE/PHFPFGVV    | 340 |
| <b>WP_007216414.1</b> | GHFAYYGGSSGTSNYPSTEPIDATFLNGKFKDAKAVNAQEFKVF/FLGLGTAE/PHFPFGVV   | 340 |
| WP_123120797.1        | DFFSSLCG/FSGTSNYPNDV/NPATFLDGKFNDAAN/KQK/VLFLGLGTKEPNPFGSV       | 341 |
| WP_066034169.1        | DFFAYYGGFSGTANYPSSDAIDASTFLNGKFKDGNAN/KQK/VLFWLGLGTKEPAPFPKSV    | 346 |
| WP_055090457.1        | NFFSYGGFSGTSNYPSSADAI/DVNTFLDGKFKDGSVNEK/KLFWLGLGTKEPSPFPGSV     | 342 |
| WP_035660712.1        | DFFSHYGGFSGTSNYPSSADAI/DVNTFLDGKFKDGNAN/KK/VLFWLGLGTKEPSPFPGSV   | 342 |
| WP_083552732.1        | DFFSHYGGFSGTSNYPSSADAI/DVNTFLDGKFKDGNAN/KK/VLFWLGLGTKEPSPFPGSV   | 342 |
| WP_066330097.1        | DFFSHYGGFSGTSNYPSSADAI/DVNTFLDGKFKDANAN/KK/VLFWLGLGTKEPSPFPGSV   | 342 |
| WP_068704550.1        | DFFSYIAGFSGTSNYPSTPAIDVETFLNGAFKFKDGAAN/KQK/VLFWLGLGTVE/PAPFPGSV | 340 |
| WP_020531203.1        | DVFASYGGFSGTSNYPSSADDI/DVNTFLGGKFKDGEAL/SKQK/VLFWLGLGTKEPDPFPGSV | 357 |
| WP_016778581.1        | DFFAFYGGFSGTANYPSSDEIDVETFLDGAFAFDGKVD/EO/KVLWGLGLGTKEPEPFPFESI  | 343 |
| WP_106153941.1        | DFFAFYGGFSGTANYPSSDEIDVKTFLDGAFAFDKVD/EO/KVLWGLGLGTKEPDPFPGSI    | 342 |
| WP_053183372.1        | GVFSNYGGFSGTSNYPSSSEIDPATFLDGKFKDGGKVN/EO/VLFWLGLGTKEPEPFPGSV    | 344 |
| WP_045027037.1        | DFFAFYGGFSGTSNYPSSDEIDVETFLNGAFKFKGKSVND/OK/VLFWLGLGTKEPEPFPGSV  | 338 |
| WP_038555069.1        | DFFAFYGGFSGTSNYPSSDEIDVETFLNGAFKFKGKSVNKQK/VLFWLGLGTKEPEPFPGSV   | 338 |

(Glu332)

|                       |                                                 |     |
|-----------------------|-------------------------------------------------|-----|
| PZX17224.1            | GAFRNMLEQQGIRHVFYYSQGTAEHWLTWRRSLHQYAQLVFK--    | 388 |
| WP_117954567.1        | KAFROMLDKQGIKYTYYESPETAEHWLTWRRALHQYAQLLEQ--    | 384 |
| <b>WP_007661004.1</b> | KAFROMMDKQGIKYVYYESEPETAHEWLTWRRALNEFAPLLFK--   | 382 |
| WP_007216414.1        | KAFROMMDKQGIKYVYYESEPETAHEWLTWRRALNEFAPLLFK--   | 382 |
| WP_123120797.1        | GAFRNMLEKQGIKYVYYS/PATSHWLTWRRDLKEFAQLLFFK--    | 384 |
| WP_066034169.1        | GAFRTMLEQQGIKYDYYESPETAEHWLTWRRCLHQFASKLFK--    | 388 |
| WP_055090457.1        | GAFRNMLEKQGIKYTYYESAETAHEWLTWRRCLNQFAAKLFK--    | 384 |
| WP_035660712.1        | RAFRRKMLEKQSIKYVYYESEPETAHEWLTWRRCLNQFASKLFK--  | 384 |
| WP_083552732.1        | GVFRTMLEQQGIKYAYYESPKETAHEWLTWRRCLNQFATQLEFK--  | 384 |
| WP_066330097.1        | GAFRTMLEKQGIKYGYYESPETAEHWLWRRCLNQFAAKLEQ--     | 384 |
| WP_068704550.1        | KAFRNMLEKQGIKYTYYESQGTAEHWLTWRRCLNQFAALLFK--    | 382 |
| WP_020531203.1        | GAFRNMIDNIGLDHVYYESEPETAHEWLTWRRSLKEYAALLFK--   | 399 |
| WP_016778581.1        | GFTINMIKKQGIQYEYYESPETAEHWLTWRRSLYQYAQLLFK--    | 385 |
| WP_106153941.1        | GAFINMIKKQGIQYEYYESPETAEHWLTWRRSLYQYAQLLFK--    | 384 |
| WP_053183372.1        | GAFRRKMLEKQGIKYVYYESEPETAHEWLTWRRSLHEYAQR/LFKKN | 388 |
| WP_045027037.1        | GAFRNMLEKQGIQYVYYESEPETAHEWLTWRRSLHQYAQLLFK--   | 380 |
| WP_038555069.1        | GAFRNMLEKQGIQYVYYESEPETAHEWLTWRRSLHQYAQLLFK--   | 380 |

(His364)

C

WP\_062122566.1 --MKNV-VKLMFSLVLI SFMANGQNAPAFPEGTLPNEHNIAGADYPRVGEDGRVHFRVF 57  
 WP\_071144963.1 --MKNRLANVLIALIGFVPIV--IAAAQESFPEGTVPNNEHNIAGADYPRIGVDRRVHFRVH 56  
 WP\_123396861.1 --MKTFLSKLILSTCLVPLA-LGAQQQPAFPAGTVPNEHNIAGADYPRIGEDGRVHFRVF 56  
 WP\_101690191.1 --MKRV-LKLVFFLALPMV-LNAQQQDFPEGTVPNEHNIAGADYPRIGEDGRVHFRVH 56  
 WP\_007660993.1 --MKNV-LKLI FSSLLMF PFT-MNAQQQDFPAGTVPNEHNIAGADYPRIGEDRRVHFRVH 56  
 WP\_082717889.1 MLMKNV-LKLI FSSLLVFPFT-MNAQQQDFPAGTVPNEHNIAGADYPRIGEDRRVHFRVH 58  
 WP\_081743618.1 MLMKNV-LKLI FSSLLALPFT-MNAQQQDFPAGTVPNEHNIAGADYPRIGEDRRVHFRVH 58  
 WP\_004293186.1 --MKNA-LKLI FSSLLALPLT-MYAQQQDFPEGTVPNEHNIAGADYPRIGEDRRVHFRVF 56  
 WP\_022104001.1 --MKNA-LNFI FLFLAVFPLT-MYAQQEFPAGTVPNEHNIAGADYPRIGEDRRVHFRVF 56  
 WP\_026314837.1 --MKNA-LNFI FLFLAALPLT-VYAQQEDFPAGTVPNEHNIAGADYPRIGEDRRVHFRVF 56

WP\_062122566.1 APDAQKVEISFRGEMTKGDDGFWLISDEPEVGFHYYQIINDVSVADPHGCKPFFGMGK 117  
 WP\_071144963.1 APNAQKVEISFRGEMTKADGYSLSVSKAEVGFHYYQIINDGVSAADPNKPPFFGMGK 116  
 WP\_123396861.1 APNAQKVEISFRGEMTKGDDGFWLISVSKPEVWGFHYYQIINDGVSAADPNKPPFFGMGK 116  
 WP\_101690191.1 APNAQKVEISFRGEMTKADGYSLSVSKPEVWGFHYYQIINDGVSAADPNKPPFFGMGK 116  
 WP\_007660993.1 APNAQKVEISFRGEMTKADGYSLSVSKPEVGFHYYQIINDGVSAADPNKPPFFGMGK 116  
 WP\_082717889.1 APNAQKVEISFRGEMTKADGYSLSVSKPEVGFHYYQIINDGVSAADPNKPPFFGMGK 118  
 WP\_081743618.1 APNAQKVEISFRGEMTKADGYSLSVSKPEVWGFHYYQIINDGVSAADPNKPPFFGMGK 118  
 WP\_004293186.1 APNAQKVEISFRGEMTKADGYSLSVSKPEVWGFHYYQIINDGVSAADPNKPPFFGMGK 116  
 WP\_022104001.1 APNAQKVEISFRGEMTKADGYSLSVSKPEVWGFHYYQIINDGVSAADPNKPPFFGMGK 116  
 WP\_026314837.1 APNAQKVEISFRGEMTKADGYSLSVSKPEVWGFHYYQIINDGVSAADPNKPPFFGMGK 116

WP\_062122566.1 WVSGIIEPEKGCDDYKPKQGVPHGLVSWWYYSVRCWRRQVYTPAEYDKNPKKYPV 177  
 WP\_071144963.1 WVSGIIEPEKGVDDYYSIK--NVPHGLVSWWYYSDIRKEWRQVYTPAEYDKNPKKYPV 175  
 WP\_123396861.1 WVSGIIEPEKGVDDYYSIK--NVPHGLVSWWYYSKIRWRRQVYTPAEYDKNPKKYPV 175  
 WP\_101690191.1 WVSGIIEPEKGVDDYYSIK--NVPHGLVSWWYYSQVYSDIRKEWRQVYTPAEYDKNPKKYPV 175  
 WP\_007660993.1 WVSGIIEPEKGVDDYYSIK--NVPHGLISQSWYYSDIRKEWRQVYTPAEYDKNPKKYPV 175  
 WP\_082717889.1 WVSGIIEPEKGVDDYYSIK--NVPHGLISQSWYYSDIRKEWRQVYTPAEYDKNPKKYPV 177  
 WP\_081743618.1 WVSGIIEPEKGVDDYYSIK--NVPHGLISQSWYYSDIRKEWRQVYTPAEYDKNPKKYPV 177  
 WP\_004293186.1 WVSGIIEPEKGVDDYYSIK--NVPHGLISQSWYYSIRWRRQVYTPAEYDKNPKKYPV 175  
 WP\_022104001.1 WVSGIIEPEKGVDDYYSIK--NVPHGLISQSWYYSDIRKEWRQVYTPAEYDKNPKKYPV 175  
 WP\_026314837.1 WVSGIIEPEKGVDDYYSIK--NVPHGLISQSWYYSDIRKEWRQVYTPAEYDKNPKKYPV 175

WP\_062122566.1 LYLQHGGENETSWANQGMNFI MDNLI AEGKVTPIVMDNGNIEVLFKAEEDMNEVFR 237  
 WP\_071144963.1 LYLQHGGENETSWANQGMNFI MDNLI AEGKAPMIVMDNGNIEVLFKAEEDMNEVFR 235  
 WP\_123396861.1 LYLQHGGENETSWANQGMNFI MDNLI AEGKAPMIVMDNGNIEVLFKAEEDMNEVFR 235  
 WP\_101690191.1 LYLQHGGENETSWANQGMNFI MDNLI AEGKAPMIVMDNGNIEVLFKAEEDMNEVFR 235  
 WP\_007660993.1 LYLQHGGENETSWANQGMNFI MDNLI AEGKAPMIVMDNGNIEVLFKAEEDMNEVFR 235  
 WP\_082717889.1 LYLQHGGENETSWANQGMNFI MDNLI AEGKAPMIVMDNGNIEVLFKAEEDMNEVFR 237  
 WP\_081743618.1 LYLQHGGENETSWANQGMNFI MDNLI AEGKAPMIVMDNGNIEVLFKAEEDMNEVFR 237  
 WP\_004293186.1 LYLQHGGENETSWANQGMNFI MDNLI AEGKAPMIVMDNGNIEVLFKAEEDMNEVFR 235  
 WP\_022104001.1 LYLQHGGENETSWANQGMNFI MDNLI AEGKAPMIVMDNGNIEVLFKAEEDMNEVFR 235  
 WP\_026314837.1 LYLQHGGENETSWANQGMNFI MDNLI AEGKAPMIVMDNGNIEVLFKAEEDMNEVFR 235

WP\_062122566.1 KRFGAQPFAILLVNEIIPHIESNFRVLTDRNRAMAGLSWGGLLTFNNTLNNLDKFAYIGG 297  
 WP\_071144963.1 KRFGGQFPDILLVKEIIPHIESNFRVLTDRNRAMAGLSWGGLLTFNNTLNNLDKFAYIGG 295  
 WP\_123396861.1 KRFGGQFPDILLVKEIIPHIESNFRVLTDRNRAMAGLSWGGLLTFNNTLNNLDKFAYIGG 295  
 WP\_101690191.1 KRFGGQFPDILLVKEIIPHIESNFRVLTDRNRAMAGLSWGGLLTFNNTLNNLDKFAYIGG 295  
 WP\_007660993.1 KRFGAQPFAILLVNEIIPHIESNFRVLTDRNRAMAGLSWGGLLTFNNTLNNLDKFAYIGG 295  
 WP\_082717889.1 KRFGAQPFAILLVNEIIPHIESNFRVLTDRNRAMAGLSWGGLLTFNNTLNNLDKFAYIGG 297  
 WP\_081743618.1 KRFGAQPFAILLVNEIIPHIESNFRVLTDRNRAMAGLSWGGLLTFNNTLNNLDKFAYIGG 297  
 WP\_004293186.1 KRFGAQPFAILLVNEIIPHIESNFRVLTDRNRAMAGLSWGGLLTFNNTLNNLDKFAYIGG 295  
 WP\_022104001.1 KRFGAQPFAILLVNEIIPHIESNFRVLTDRNRAMAGLSWGGLLTFNNTLNNLDKFAYIGG 295  
 WP\_026314837.1 KRFGAQPFAILLVNEIIPHIESNFRVLTDRNRAMAGLSWGGLLTFNNTLNNLDKFAYIGG 295

(Ser273)

WP\_062122566.1 FSGAGSIDLNNLDAAVYNGVFSASAFAFNKVKVFFLGVGSEEHPERTKLS DGLKAAGINN 357  
 WP\_071144963.1 FSGAGSIDLNNLDVYGGVFKDRKAFNDKVHVFVFLGIGSEEHPERTKLS DGLKAAGINN 355  
 WP\_123396861.1 FSGAGSIDLNNLDVYGGVFKDRKAFNDKVHVFVFLGIGSEEHPERTKLS DGLKAAGINN 355  
 WP\_101690191.1 FSGAGSIDLNNLDVYGGVFKDRKAFNQQVHVFVFLGIGSEEHPERTKLS DGLKAAGINN 355  
 WP\_007660993.1 FSGAGSIDLNNLDVYGGVFKDRKAFNDKVHVFVFLGIGSEEHPERTKLS DGLQAAGINT 355  
 WP\_082717889.1 FSGAGSIDLNNLDVYGGVFKDRKAFNDKVHVFVFLGIGSEEHPERTKLS DGLQAAGINT 357  
 WP\_081743618.1 FSGAGSIDLNNLDVYGGVFKDRKAFNDKVHVFVFLGIGSEEHPERTKLS DGLQAAGINT 357  
 WP\_004293186.1 FSGAGSIDLNNLDVYGGVFKDRKAFNDKVHVFVFLGIGSEEHPERTKLS DGLKAAGINN 355  
 WP\_022104001.1 FSGAGSIDLNNLDVYGGVFKDRKAFNDKVHVFVFLGIGSEEHPERTKLS DGLKAAGINN 355  
 WP\_026314837.1 FSGAGSIDLNNLDVYGGVFKDRKAFNDKVHVFVFLGIGSEEHPERTKLS DGLKAAGINN 355

(Glu336)

WP\_062122566.1 IYYESPGTAHEFLTWRRLKEFAPLLFK--- 385  
 WP\_071144963.1 IYYESPGTAHEFLTWRRLKEFVPLLVKFK 386  
 WP\_123396861.1 IYYESPGTAHEFLTWRRLKEFAPLLFN--- 383  
 WP\_101690191.1 IYYESPGTAHEFLTWRRLKEFVPLLVTKK 386  
 WP\_007660993.1 IYYESPGTAHEFLTWRRLKEFAPLLFKTK- 385  
 WP\_082717889.1 IYYESPGTAHEFLTWRRLKEFVPLLVKTK- 387  
 WP\_081743618.1 IYYESPGTAHEFLTWRRLKEFAPLLFKTK- 387  
 WP\_004293186.1 IYYESPGTAHEFLTWRRLKEFVPLLVKTK- 384  
 WP\_022104001.1 IYYESPGTAHEFLTWRRLKEFAPLLFK--- 383  
 WP\_026314837.1 IYYESPGTAHEFLTWRRLKEFVPLLVKTK--- 383

(His365)

**Supplementary Figure 13. Alignments showing that the newly characterized polypeptides associated with the EGE PUL and demonstrated to cleave side-chain ester-linkages from complex arabinoxylans are widely distributed. a**

A search was made in the Genbank protein database (<https://www.ncbi.nlm.nih.gov/protein/>) to extract polypeptides with high sequence identities to the *B. intestinalis* homolog (**accession number bolded and italicized-Bi1040-FAE**) and aligned with the CLUSTAL Multiple Alignment program. The Genbank accession numbers and annotations are as follows: SEH83175.1 Acetyl esterase/lipase [*Prevotella ruminicola*]; WP\_006281679.1 alpha/beta hydrolase [*Prevotella bryantii*]; >WP\_100993215.1 alpha/beta hydrolase [*Spirosoma pollinicola*]; WP\_020527766.1 alpha/beta hydrolase [*Flexithrix dorotheae*]; WP\_099150634.1 alpha/beta hydrolase [*Lewinella nigricans*]; WP\_013768612.1 alpha/beta hydrolase [*Haliscomenobacter hydrossis*]; WP\_114463085.1 alpha/beta hydrolase [*Runella* sp. YX9]; WP\_015029998.1 alpha/beta hydrolase [*Emticicia oligotrophica*]; WP\_055151666.1 alpha/beta hydrolase [*Jiulongibacter sediminis*]; WP\_006799192.1 alpha/beta hydrolase [*Dysgonomonas gadei*]; WP\_027452672.1 alpha/beta hydrolase [*Prevotella albensis*]; KQB43445.1 Esterase/lipase [*Flavobacterium daejeonense*]; WP\_071144936.1 alpha/beta hydrolase [*Bacteroides ihuae*]; WP\_100615198.1 alpha/beta hydrolase [*Confluentibacter citreus*]; WP\_123396545.1 alpha/beta hydrolase [*Muribaculaceae* bacterium Isolate-102 (HZI)]; WP\_117741097.1 glycoside hydrolase [*Bacteroides stercoris*]; >WP\_050793236.1 glycoside hydrolase [**bolded-Bacteroides eggerthii**]; WP\_024996568.1 alpha/beta hydrolase [*Bacteroides graminisolvens*]; >WP\_018709923.1 alpha/beta hydrolase [*Bacteroides barnesiae*]; EDV05955.1 hypothetical protein BACINT\_01040-FAE [*Bacteroides intestinalis*]; and WP\_007216415.1 alpha/beta hydrolase [*Bacteroides cellulosilyticus*]. The *B. eggerthii* and *B. stercoris* polypeptides are from the C-terminal esterase module of the bi-functional enzyme (GH43/FAE). The crystal structure of the *B. eggerthii* bi-functional enzyme (**bolded**) was solved in this study.

**b** A search was made in the Genbank protein database to extract polypeptides with high sequence identities to the *B. intestinalis* homolog (**accession number bolded-Bi1039-CE1**) and aligned with the CLUSTAL Multiple Alignment program. The Genbank accession numbers and annotations are as follows: PZX17224.1 enterochelin esterase family protein [*Cytophaga xylanolytica*]; WP\_117954567.1 esterase [*Bacteroides stercoris*]; WP\_007661004.1 esterase [*Bacteroides intestinalis*]; WP\_007216414.1 esterase [*Bacteroides cellulosilyticus*]; WP\_123120797.1 esterase [*Ferruginibacter* sp. BO-59]; WP\_066034169.1 esterase [*Flavobacterium anhuiense*]; WP\_055090457.1 esterase [*Flavobacterium daejeonense*]; WP\_035660712.1 esterase [*Flavobacterium seoulense*]; WP\_083552732.1 esterase [*Flavobacterium flevense*]; WP\_066330097.1 esterase [*Flavobacterium glycinis*]; WP\_068704550.1 esterase [*Paludibacter jiangxiensis*]; WP\_020531203.1 hypothetical protein

[*Flexithrix dorotheae*]; WP\_016778581.1 esterase [*Anaerophaga thermohalophila*]; WP\_106153941.1 esterase [*Marinilabilia salmonicolor*]; WP\_053183372.1 esterase [*Sunxiuqinia dokdonensis*]; WP\_045027037.1 esterase [*Draconibacterium sediminis*]; and WP\_038555069.1 esterase [*Draconibacterium orientale*]. The accession number of the *B. intestinalis* enzyme with the crystal structure solved in this study is bolded. **c** A search was made in the Genbank protein database to extract polypeptides with high sequence identities to the *B. intestinalis* homolog (**accession number bolded-Bi1033-CE1**) and aligned with the CLUSTAL Multiple Alignment program. The Genbank Accession numbers and their annotations are as follows: WP\_062122566.1 esterase [*Geofilum rubicundum*]; WP\_071144963.1 esterase [*Bacteroides ihuae*]; WP\_004293186.1 carbohydrate-binding protein [*Bacteroides eggerthii*]; WP\_101690191.1 esterase [*Dysgonomonas* sp. Marseille-P4356]; WP\_007660993.1 hypothetical protein [*Bacteroides intestinalis*, Bi1033-CE1]; WP\_082717889.1 esterase [*Bacteroides cellulosilyticus*]; WP\_081743618.1 esterase [*Bacteroides timonensis*]; WP\_123396861.1 esterase [Muribaculaceae bacterium Isolate-102 (HZI)]; WP\_022104001.1 carbohydrate-binding protein [*Bacteroides stercoris*]; and WP\_026314837.1 esterase [*Bacteroides gallinarum*]. The accession number of the *B. intestinalis* enzyme with the crystal structure solved in this study is bolded. The amino acids that identical (shaded black) or similar (grey) in >50% of the positions are indicated. Amino acids with similar properties are grouped as LIMV, AG, YWF, DEQN, KRH and ST. The catalytic triad in each enzyme family are highlighted in red. The N-terminal regions are not shaded, as these regions represent signal peptides for secretion and are unlikely to be involved in the folding of the functional proteins.

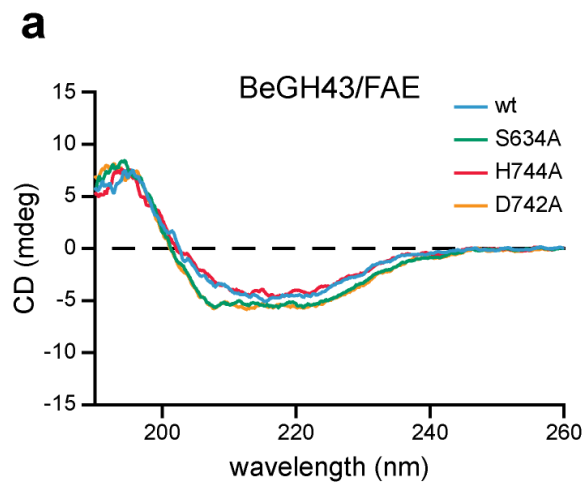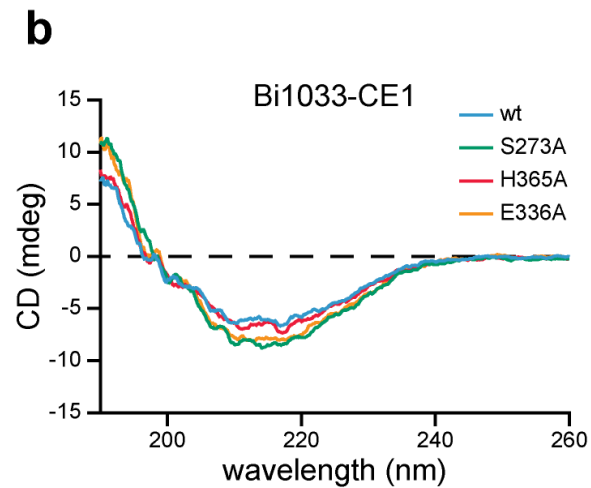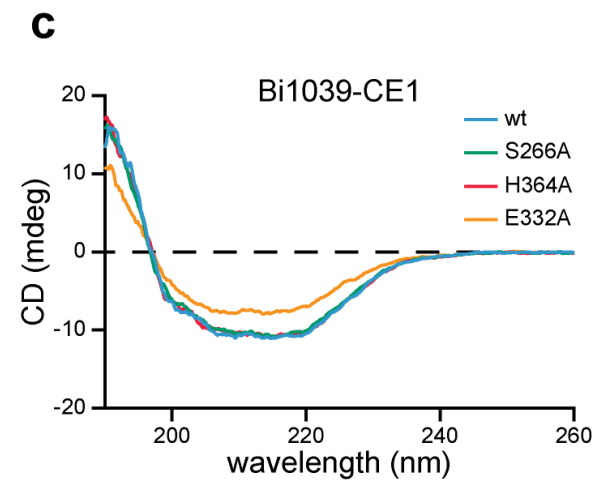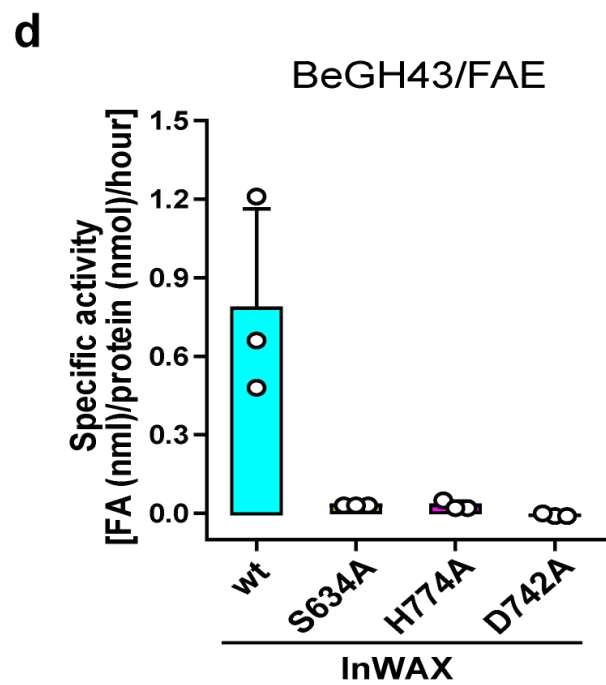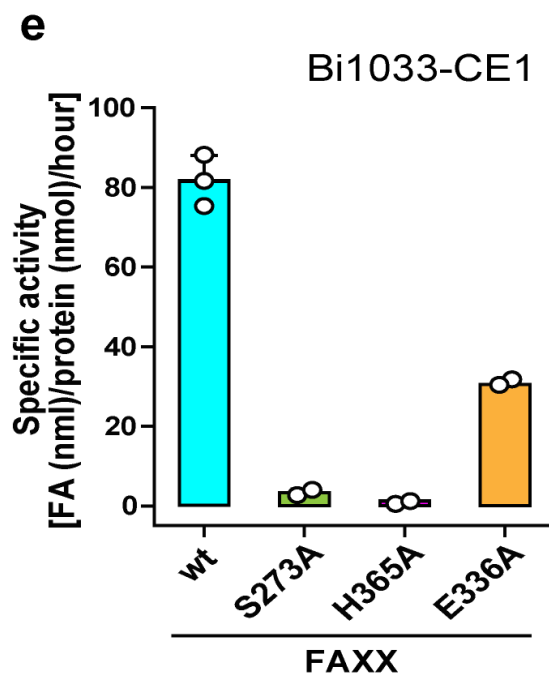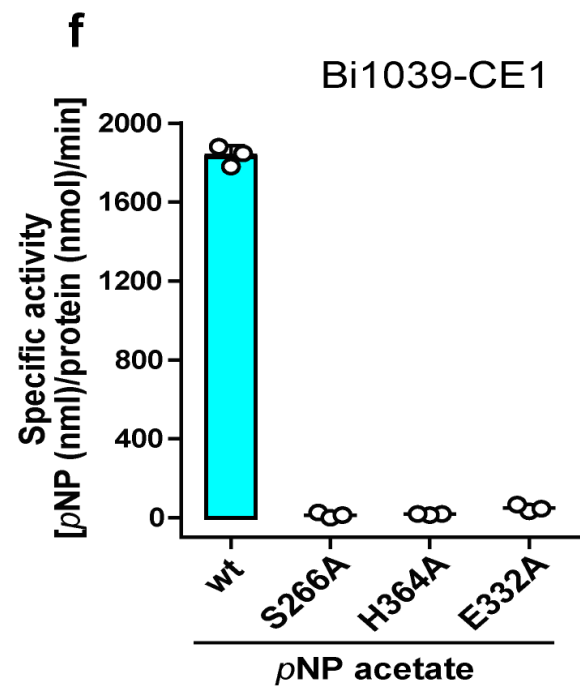

**Supplementary Fig. 14. Mutational analysis of the putative catalytic triads.** The residues (Ser-His-Glu/Asp) that constitute the proposed catalytic triad in BeGH43-Fae (S634, H774, D742), Bi1033-CE1 (S273, H365, E336) and Bi1039-CE1 (S266, H364, E332) were substituted with alanine by site-directed mutagenesis. Circular dichroism scans of mutant recombinant proteins of **a** BeGH43/FAE **b** Bi1033-CE1 and **c** Bi1039-CE1 compared to their wild-type counterparts. Proteins (0.1 mg/ml) were dialyzed in 10 mM potassium phosphate buffer pH 7.5 and CD spectra were collected at 25°C from 190 nm to 260 nm at a speed of 50 nm/min with a 0.1-nm wavelength pitch, with five accumulations. Relative feruloyl esterase activity of the mutant **d** BeGH43/FAE **e** Bi1033-CE1 and **f** Bi1039-CE1 proteins presented as a percentage of the activity of the corresponding wild-type proteins on insoluble wheat arabinoxylan (InWAX), the feruloylated trisaccharide (FAXX), and the synthetic substrate, para-nitrophenyl acetate (*p*NP Acetate), respectively. The bars are means  $\pm$  standard deviations. In **d** and **f**,  $n = 3$  independent reactions. In **e**,  $n = 2$  independent reactions. The source data underlying Supplementary Figs. 14d-f are provided in the Source Data file.

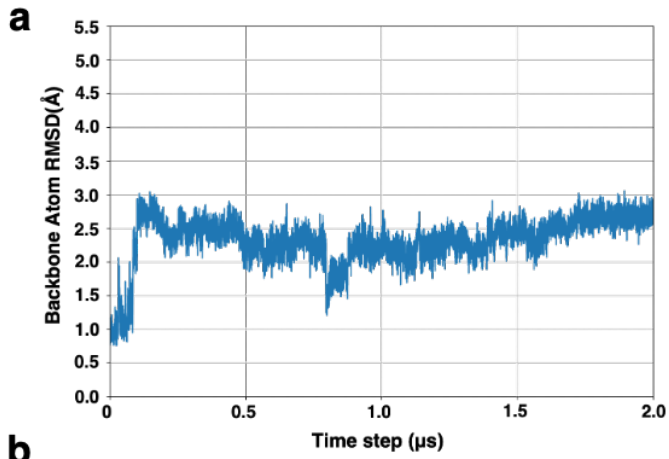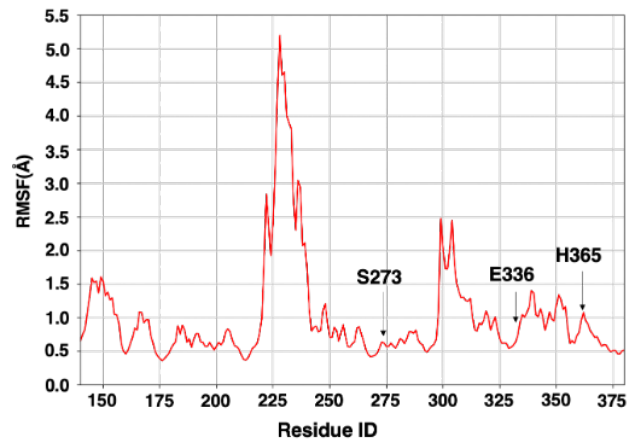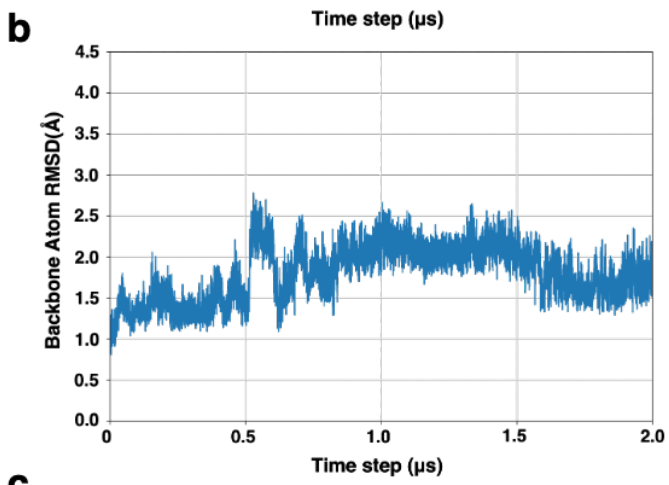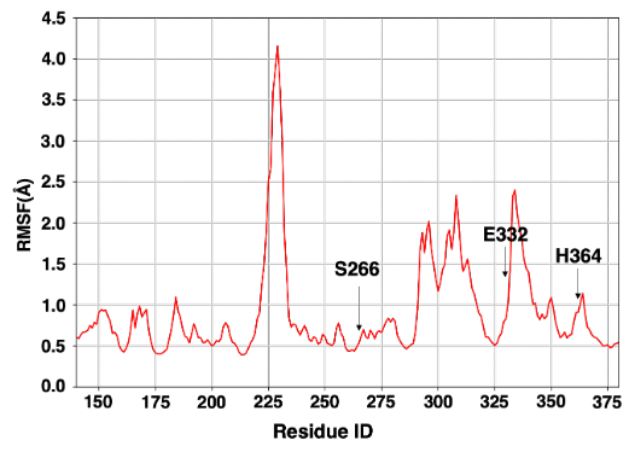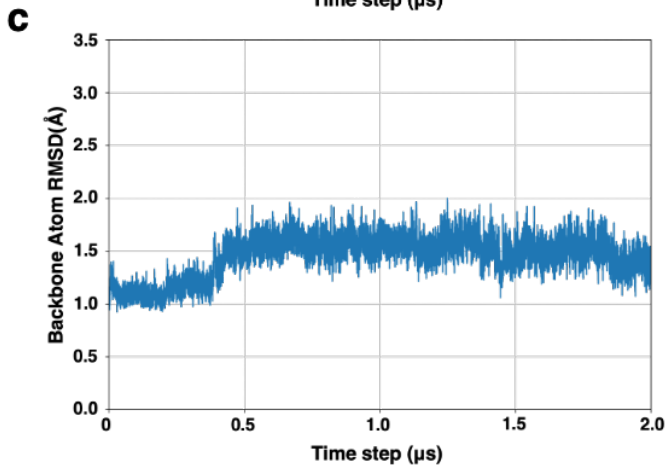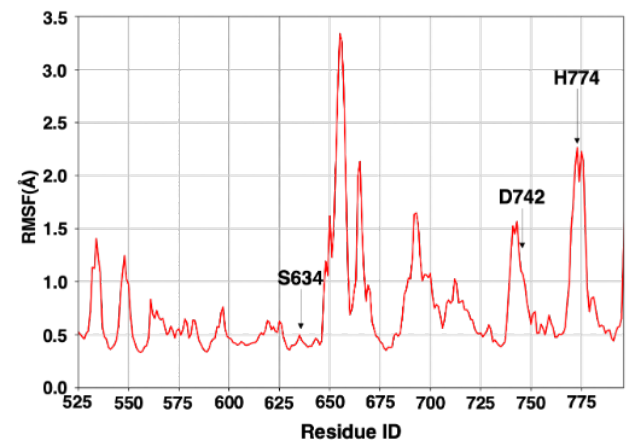



**Supplementary Fig 15. RMSD and RMSF analysis of esterase domains of three esterase enzymes** (Bi1033-CE1, Bi1039-CE1, and BeGH43/FAE in **a**, **b**, and **c**, respectively). The three figures in the left panel show root mean square deviations of all three proteins. The three figures in the right panel represent root mean square fluctuations of all three proteins. Approximate positions of catalytic triad residues are indicated by an arrow. The analysis was done on 2  $\mu$ s of simulation data on each protein. For Bi1033-CE1 and Bi1039-CE1, first 15 residues were omitted from calculations because of the large fluctuation of these residues.

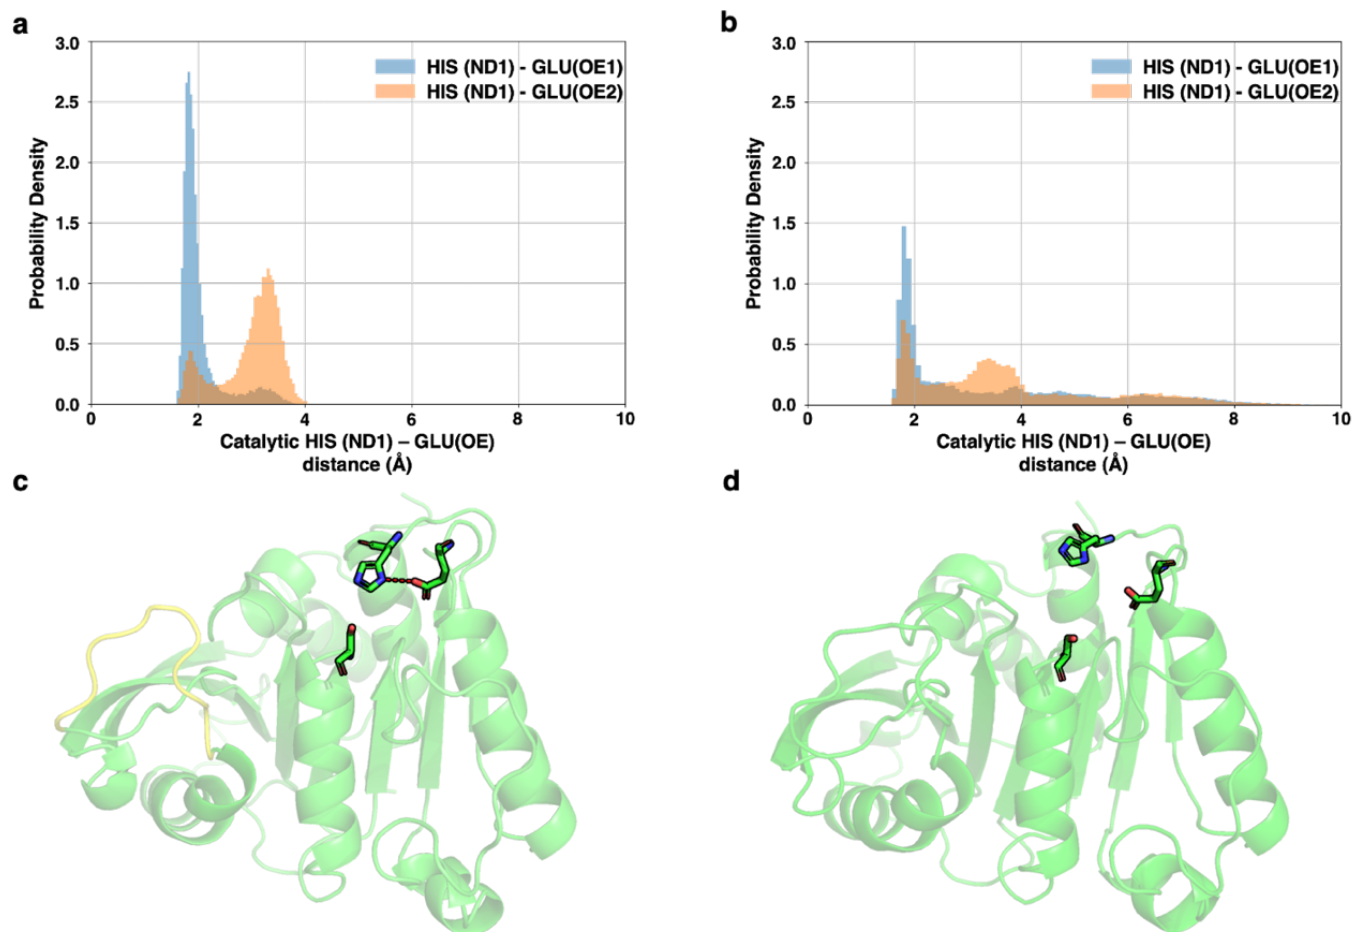

**Supplementary Fig. 16. Higher stability in acid-base hydrogen bonding may lead to higher catalytic activity.** **a, b** Distance between HIS (ND1) and GLU (OE1, color: Blue; OE2, color: Orange) atoms are represented as a 1-D histogram with increasing mean distance from left (Bi1033-CE1) to right (Bi1039-CE1). **c, d** Cartoon representation of esterase domain of Bi1039-CE1. Catalytic triad residues are shown as stick. Hydrogen Bond between HIS-GLU residue are shown as red dot. In **c**, hydrogen bond between base (HIS) and acid exists but in **d**, base (HIS) moves away from the acid molecule.

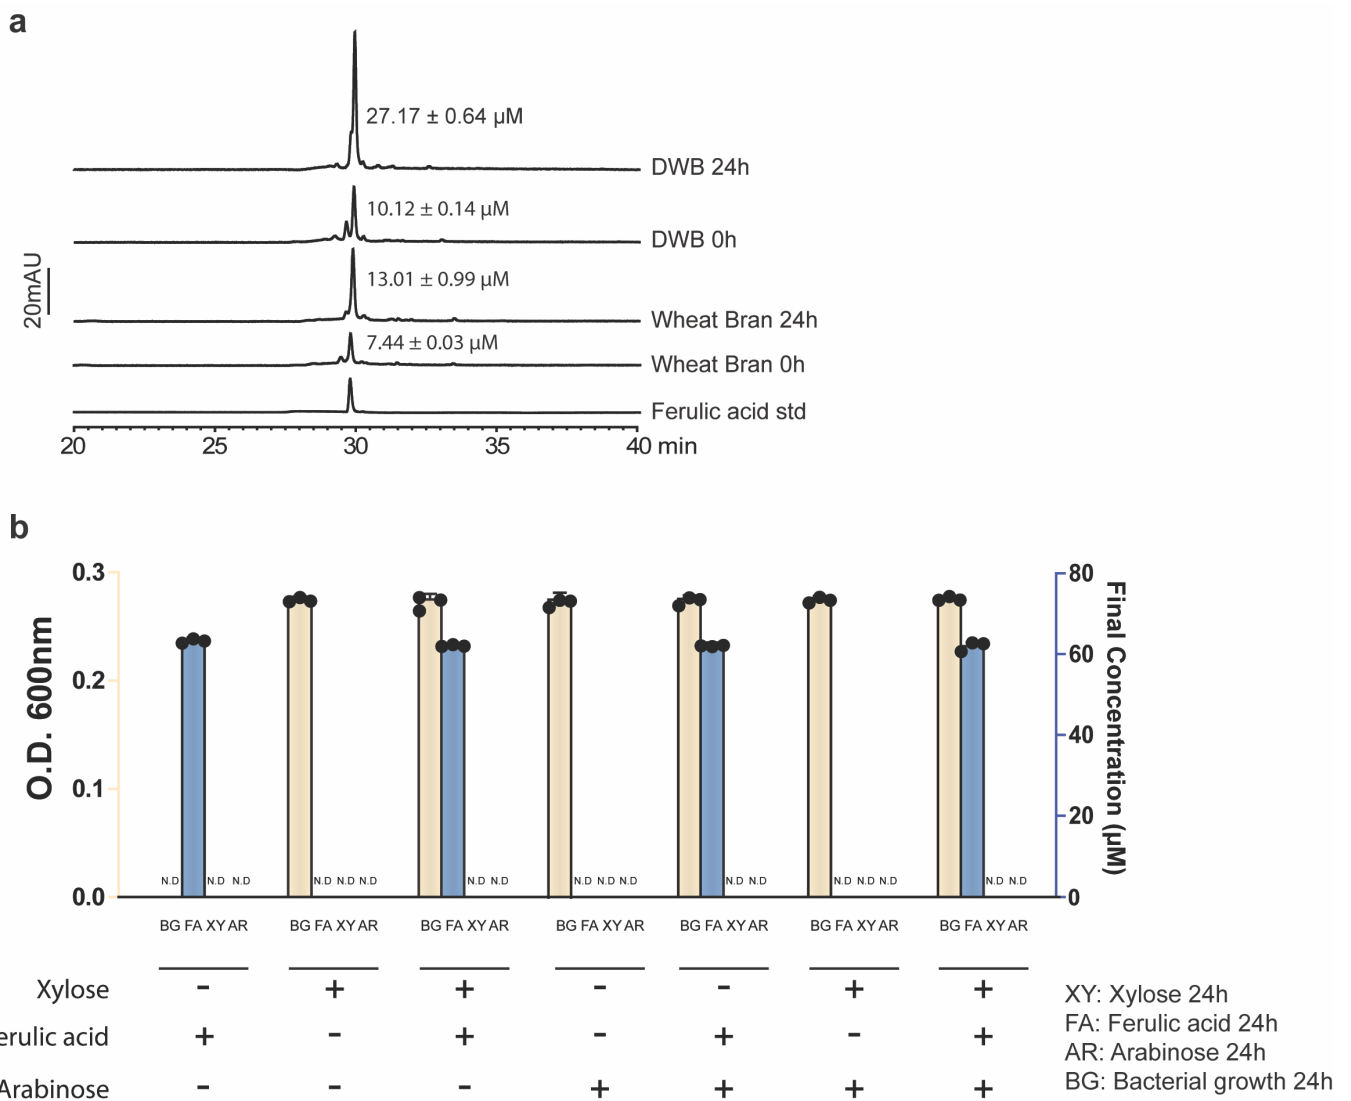

**Supplementary Fig. 17. Accumulation of ferulic acid in the spent medium of *B. intestinalis* during growth on arabinoxylan.** **a** HPLC-DAD chromatograms of *B. intestinalis* spent medium during growth on wheat bran or de-starched wheat bran (DWB) as sole carbon source, showing accumulation of ferulic acid in the medium after bacterial culture. The y-axis is absorbance in milli-absorbance units (mAU). **b** Growth of *B. intestinalis* in minimal medium containing ferulic acid as sole carbon source or supplemented with different monosaccharides from arabinoxylan, suggesting the lack of utilization of the phenolic compound by the bacterium. BG: bacterial growth; FA: ferulic acid; XY: xylose; AR: arabinose. In **a**, the results are presented as the mean  $\pm$  the standard deviation of three independent reactions ( $n=3$ ), and the traces are representatives of the three different BG reactions. In **b**, the bars indicate means  $\pm$  standard deviations of three independent reactions ( $n=3$ ). ND: not detected. The source data underlying Supplementary Fig. 17**a-b** are provided in the Source Data file.

**a**Fermentation end products *B. intestinalis*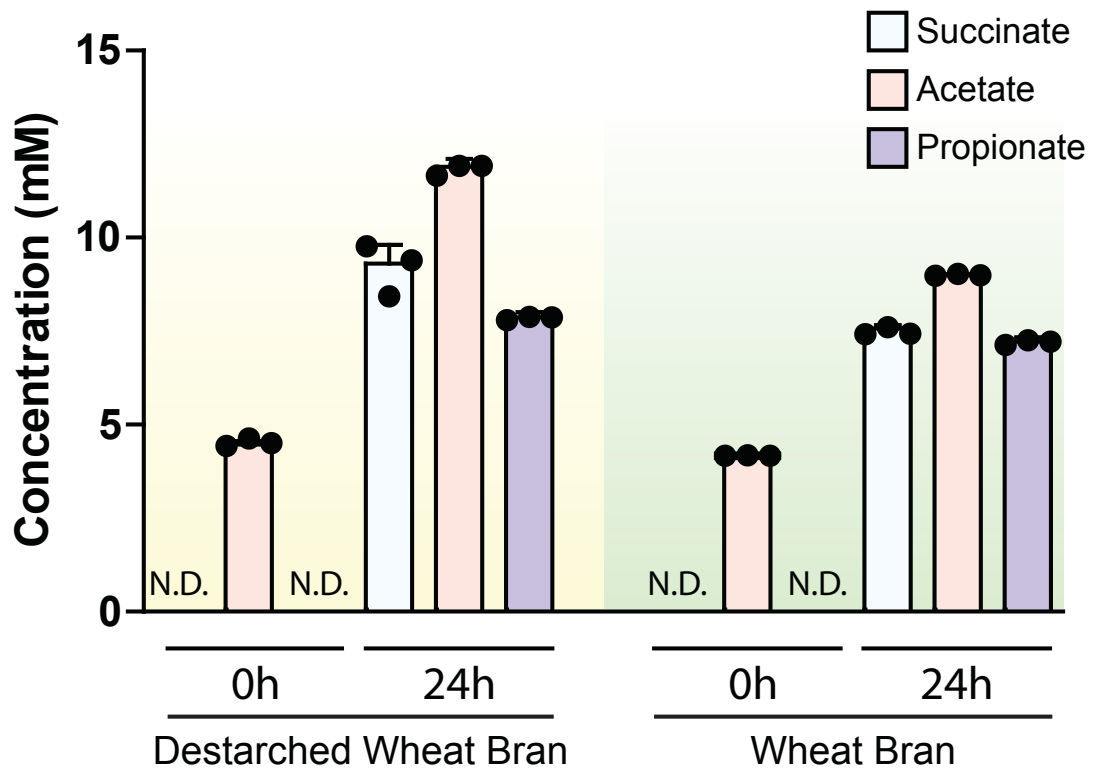**b**

## Protein content in medium

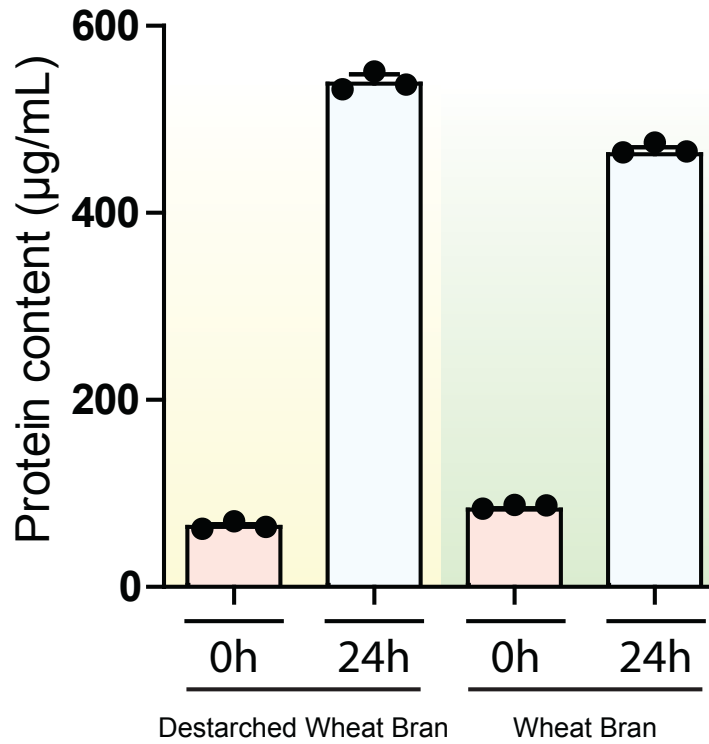

**Supplementary Fig. 18. The end products during growth of *B. intestinalis* in a minimal medium containing wheat bran or de-starched wheat bran as a sole carbon source. a** The major end products of fermentation of *B. intestinalis* cells grown on either substrate for 24 hours. **b** Protein accumulation in the medium containing either substrate after culturing with *B. intestinalis* cells for 24 hours. In **a** and **b**, the bars indicate means  $\pm$  standard deviations of three independent reactions (n=3). The source data underlying Supplementary Figs. 18**a-b** are provided in the Source Data file.

**Supplementary Table 1: X-ray data collection and refinement statistics.**

|                           |                                        |                                          |                                                |                                 |
|---------------------------|----------------------------------------|------------------------------------------|------------------------------------------------|---------------------------------|
| Protein                   | Bi1033<br>(dimer/ASU)                  | Bi1033<br>(monomer/ASU)                  | BeGH43-FAE                                     | Bi1039                          |
| PDB ID                    | 6MOU                                   | 6MOT                                     | 6MLY                                           | 6NE9                            |
| Resolution (Å)            | 76.37 - 2.24<br>(2.32 - 2.24)          | 86.57 - 1.71<br>(1.77 - 1.71)            | 48.16 - 2.7<br>(2.8 - 2.7)                     | 28.6 - 1.74<br>(1.8 - 1.74)     |
| Space group               | P 3 <sub>1</sub> 2 1                   | P 6 <sub>4</sub> 2 2                     | C 1 2 1                                        | C 2 2 2 <sub>1</sub>            |
| Unit cell (Å)             | a=b=95.2,<br>c=202.6;<br>$\gamma$ =120 | a=b=99.9,<br>c=164.204;<br>$\gamma$ =120 | a=254.7,b=93.3,<br>c=214.0,<br>$\beta$ =123.38 | a=116.7,<br>b=126.6,<br>c=110.3 |
| Total reflections         | 302305<br>(30106)                      | 2143630<br>(125664)                      | 383527 (32441)                                 | 145030<br>(2851)                |
| Unique reflections        | 52004<br>(5143)                        | 52998 (5201)                             | 113690 (10279)                                 | 76952<br>(2380)                 |
| Multiplicity              | 5.8 (5.9)                              | 40.4 (24.2)                              | 3.4 (3.2)                                      | 1.9 (1.2)                       |
| Completeness (%)          | 100.0<br>(100.0)                       | 100.0 (100.0)                            | 98.8 (90.1)                                    | 91.7 (28.6)                     |
| Mean I/sigma(I)           | 7.5 (1.9)                              | 19.3 (2.3)                               | 8.0 (1.2)                                      | 15.3 (2.0)                      |
| Wilson B-factor           | 30.9                                   | 24.6                                     | 49.0                                           | 18.2                            |
| $R_{\text{merge}}$        | 0.18 (0.78)                            | 0.14 (1.02)                              | 0.16 (1.03)                                    | 0.06 (0.23)                     |
| $R_{\text{meas}}$         | 0.20                                   | 0.15                                     | 0.19                                           | 0.09                            |
| CC1/2                     | 0.99 (0.57)                            | 0.99 (0.89)                              | 0.98 (0.52)                                    | 0.99 (0.21)                     |
| CC*                       | 0.99 (0.85)                            | 1 (0.97)                                 | 0.99 (0.83)                                    | 0.99 (0.59)                     |
| $R_{\text{work}}$         | 0.19 (0.30)                            | 0.17 (0.34)                              | 0.22 (0.29)                                    | 0.18 (0.28)                     |
| $R_{\text{free}}$         | 0.24 (0.38)                            | 0.19 (0.33)                              | 0.27 (0.36)                                    | 0.22 (0.35)                     |
| Number non-hydrogen atoms | 6163                                   | 3080                                     | 24144                                          | 6165                            |
| macromolecules            | 5702                                   | 2758                                     | 23692                                          | 5568                            |
| ligands                   | 16                                     | 16                                       | 56                                             | 110                             |
| water                     | 445                                    | 306                                      | 396                                            | 487                             |
| Protein residues          | 713                                    | 345                                      | 3029                                           | 705                             |
| RMS(bonds) Å              | 0.01                                   | 0.01                                     | 0.01                                           | 0.004                           |
| RMS(angles) °             | 1.2                                    | 1.2                                      | 1.3                                            | 0.9                             |
| Ramachandran favored (%)  | 97                                     | 97                                       | 93                                             | 99                              |
| Ramachandran outliers (%) | 0                                      | 0                                        | 0.27                                           | 0                               |
| Clashscore                | 6.13                                   | 2.38                                     | 4.32                                           | 2.59                            |
| Average B-factor          | 32.7                                   | 32                                       | 64.8                                           | 24.1                            |
| macromolecules            | 32.4                                   | 30.6                                     | 64.9                                           | 23.1                            |
| ligands                   | 39.8                                   | 40.8                                     | 57.9                                           | 35.7                            |
| solvent                   | 36                                     | 44.3                                     | 62.2                                           | 33                              |

**Supplementary Table 2.** Comparison of the secondary structure the wild-type and mutant BeGH43/FAE, Bi1033-CE1 and Bi1039-CE1 proteins.

|                    | Helix (%)   | Strand (%)  | Turn (%)    | Unordered (%) |
|--------------------|-------------|-------------|-------------|---------------|
| <b>BeGH43/FAE</b>  |             |             |             |               |
| wt                 | 31.0 ± 0.00 | 25.5 ± 0.70 | 19.0 ± 2.82 | 24.5 ± 2.12   |
| S634A              | 31.5 ± 0.70 | 25.0 ± 2.82 | 18.5 ± 2.12 | 25.0 ± 4.24   |
| H744A              | 30.5 ± 0.70 | 27.0 ± 0.00 | 21.0 ± 1.41 | 21.5 ± 2.12   |
| D742A              | 31.5 ± 2.12 | 27.0 ± 1.41 | 20.5 ± 0.70 | 21.0 ± 2.82   |
| <b>Bi1033-CE1</b>  |             |             |             |               |
| wt <sup>α</sup>    | 27.3 ± 1.52 | 30.0 ± 2.64 | 15.3 ± 1.52 | 27.3 ± 5.03   |
| S273A <sup>α</sup> | 31.0 ± 2.64 | 31.3 ± 0.57 | 14.0 ± 1.00 | 23.6 ± 3.51   |
| H365A <sup>α</sup> | 24.0 ± 2.64 | 35.6 ± 6.50 | 16.6 ± 3.51 | 23.6 ± 6.65   |
| E336A <sup>α</sup> | 28.0 ± 3.00 | 34.0 ± 3.00 | 12.3 ± 2.51 | 25.6 ± 3.51   |
| <b>Bi1039-CE1</b>  |             |             |             |               |
| wt <sup>α</sup>    | 30.6 ± 1.52 | 30.6 ± 1.15 | 11.3 ± 1.15 | 27.3 ± 0.57   |
| S266A <sup>α</sup> | 30.6 ± 2.08 | 30.0 ± 1.73 | 10.6 ± 2.08 | 28.6 ± 1.52   |
| H364A <sup>α</sup> | 31.0 ± 1.00 | 29.6 ± 1.15 | 12.0 ± 1.00 | 27.3 ± 0.57   |
| E332A <sup>α</sup> | 30.3 ± 3.51 | 31.6 ± 3.21 | 10.0 ± 1.00 | 28.0 ± 0.99   |

<sup>α</sup>: No statistical significant difference between each mutant and the wild-type (wt). Statistical analyses were not carried out for the BeGH43/FAE data because they come from only two readings. The source data underlying Supplementary Table 2 are provided in the Source Data file.

**Supplementary Table 3:** Primers used to amplify the genes encoding putative esterase and putative glycosyl hydrolases.

| Primer (5'-3') | Gene                 | Sequence <sup>a</sup>                               |
|----------------|----------------------|-----------------------------------------------------|
| Bi1033For      | BACINT_01033         | catatgCAACAGCAAGATTTTCCGGCAGGAAC                    |
| Bi1033Rev      |                      | ctcgagTTATTTTCGTTTTAAATAATAGGGGAGCAAATTCCTTTCAGGC   |
| Bi1035For      | BACINT_01035         | catatgCAAATCGGCACTCCATACATCCACGATC                  |
| Bi1035Rev      |                      | ctcgagCTAATGGTCGCGGAAATTCATTTGGAATTG                |
| Bi1038For      | BACINT_01038         | catatgTTGAATAGAATGAAAAAGCTGTTATTATTTATCGCATGCTTG    |
| Bi1038Rev      |                      | ctcgagTTACTTCTTAAATAAATTCGGTAAAAATTCATTACAGACATCTGC |
| Bi1039For      | BACINT_01039         | catatgCAGACAGTGGAGGATTTCAAACCATCG                   |
| Bi1039Rev      |                      | ctcgagTTATTTAAAAAGAAGCGGAGCAAACCTCATTCAATGC         |
| Bi1040For      | BACINT_01040         | catatgCAGATTACGCAATGGACTGATATCAACTATGC              |
| Bi1040Rev      |                      | ctcgagTTAATAAAGGGTATAAAACTGTTTTTGAGGAGGATTTTTTC     |
| Bi1041For      | BACINT_01041         | catATGAAGATACTGTTTCATTTACAATAACTCTGTTCCG            |
| Bi1041Rev      |                      | ctcgagCTAAGGATGATATTTCCCAGTATTCTAATTTTGTCTC         |
| Bi1042For      | BACINT_01042         | catatgCAAACATTGCCGTATCAGAATCCTGAACTAAG              |
| Bi1042Rev      |                      | ctcgagTTATTGTAAAGTGACTTTGACAGATTGCAGGTC             |
| Bi1043For      | BACINT_01043         | catatgCAGAATCCCATTATTACGGATCAGTTCACTG               |
| Bi1043Rev      |                      | ctcgagTTATTGAAAAGTATCCAGTCGATTTCAACTTTACC           |
| BeGH43/FaeFor  | HMPREF1016_RS0111555 | ccgggatccCAAAGCCTGCAACTAATCCTGTGA                   |
| BeGH43/FaeRev  |                      | ccgctcgagTCATTTAATGTCATCGCATTTTATCGGCC              |



**Supplementary Table 4.** Primers used for Reverse Transcriptase quantitative PCR in *B. intestinalis*, *B. cellulosilyticus*, and *B. oleiciplenus*.

| Primer (5'-3') | Gene             | Sequence                     |
|----------------|------------------|------------------------------|
| Bi1036For      | BACINT_01036     | TGATTCTAACTACACTCTCTTTGGTG   |
| Bi1036Rev      |                  | TTGACAGGAGTAACGTTTCATGTAAGC  |
| Bi1037For      | BACINT_01037     | TATCAATCATGAGTTTGCTCACAAAATG |
| Bi1037Rev      |                  | TTCGTCAAATTCTTTATCTGCGCG     |
| Bi16sFor       | Bi16s rDNA       | GGAGCGTAGGCGGATTATTAAG       |
| Bi16sRev       |                  | GGAGCGTAGGCGGATTATTAAG       |
| Bc2149For      | BACCELL_02149    | GAATGGGCAGGTAACAGAAA         |
| Bc2149Rev      |                  | GGATGGCAACCGTACAGATAG        |
| Bc2148For      | BACCELL_02148    | CACTCCAGACGAGTTCTTATAC       |
| Bc2148Rev      |                  | GGCCTTCTGTACTCTTGATACC       |
| Bc16sFor       | Bc16s rDNA       | AGCAACACAATGCTATG            |
| Bc16sRev       |                  | CACGTAAACCACTTTCTT           |
| Bo2534For      | HMPREF9447_02534 | CGTATCCGGCTTCACCTATTC        |
| Bo2534Rev      |                  | GTCGAAACCTACACCCATATCC       |
| Bo2533For      | HMPREF9447_02533 | GATGCGCTGGCATAACAATAC        |
| Bo2533Rev      |                  | CTCTACTCGGAATCGGAAGAATG      |
| Bo16sFor       | Bo16s rDNA       | CCATTCATTGGGCATAG            |
| Bo16sRev       |                  | CGTACTTTCTTACCGATAC          |

**Supplementary Table 5.** Primers used for site directed mutagenesis in BeGH43/FAE, Bi1033-CE1, and Bi1039-CE1.

| Primer (5'-3')       | Gene       | Sequence <sup>a</sup>                         |
|----------------------|------------|-----------------------------------------------|
| BeGH43/Fae S634A For | BeGH43/Fae | TACCGGCTTT <b>gca</b> TCGGGTGGAC              |
| BeGH43/Fae S634A Rev |            | ATTCCTATAAAAGAAGTATCCAACCTATACTTGGC           |
| BeGH43/Fae D742A For | BeGH43/Fae | TGGTGAAGCG <b>gcc</b> ACTGTGGTTC              |
| BeGH43/Fae D742A Rev |            | TGAATAACAATAAATTTAGGATCGTTTTTATCTATATAAGTAATG |
| BeGH43/Fae H774A For | BeGH43/Fae | CGGCGGACAA <b>gct</b> GGTCCTGTCCAC            |
| BeGH43/Fae H774A Rev |            | GGAACAGAAATAAATTCTTCCAAAC                     |
| Bi1033-CE1 S273A For | Bi1033-CE1 | GGCCGGACTT <b>gcc</b> TGGGGTGGAC              |
| Bi1033-CE1 S273A Rev |            | ATGGCGCGATTATCCCTATCGGTCAG                    |
| Bi1033-CE1 E336A For | Bi1033-CE1 | CGGTTCCGAA <b>gca</b> CATCCGGAAA              |
| Bi1033-CE1 E336A Rev |            | ATGCCCAGGAAGAAGACG                            |
| Bi1033-CE1 H365A For | Bi1033-CE1 | GGGCACTGCC <b>gcc</b> GAGTTCCTCA              |
| Bi1033-CE1 H365A Rev |            | GGCGATTGTAATAGATCG                            |
| Bi1039-CE1 S266A For | Bi1039-CE1 | TGCAGGATT <b>Ggcg</b> ATGGGGGCTA              |
| Bi1039-CE1 S266A Rev |            | ATGGCGCGGTCTTCACGAC                           |
| Bi1039-CE1 E332A For | Bi1039-CE1 | TGGTACGGCC <b>gca</b> CCGCATCCTT              |
| Bi1039-CE1 E332A Rev |            | AGTCCCAGAAAGAAAACCTTAAACTGAACGTTTAC           |
| Bi1039-CE1 H364A For | Bi1039-CE1 | CGATACGGCC <b>gct</b> GAATGGCTCAC             |
| Bi1039-CE1 H364A Rev |            | GGAGATTCATAATACACATATTTAATTC                  |

a: Nucleotides mutated are in lowercase and bolded

## References:

- 1 Colquhoun, I. J., Ralet, M. C., Thibault, J. F., Faulds, C. B. & Williamson, G. Structure identification of feruloylated oligosaccharides from sugar-beet pulp by NMR spectroscopy. *Carbohydr. Res.* **263**, 243-256 (1994).
