# Supplementary material for: Degradation of complex arabinoxylans by human colonic Bacteroidetes
Source: PubMed Central journal article supplement (PMC7815789; doi:10.1038/s41467-020-20737-5), 2021-01-19
Supplement: 41467_2020_20737_MOESM3_ESM.pdf [file 41467_2020_20737_MOESM3_ESM.pdf]

## **Descriptions of Additional Supplementary Files**

### **Supplementary Data 1**

**Description:** A) Fold change comparison of the top 50 proteins in *B. intestinalis* during growth on insoluble wheat arabinoxylan (InWAX) compared to a monosaccharide mixture. B) Fold change comparison of the top 50 proteins in *B. cellulosilyticus* during growth on insoluble wheat arabinoxylan (InWAX) compared to a monosaccharide mixture. C) Fold change comparison of the top 50 proteins in *B. oleiciplenus* during growth on insoluble wheat arabinoxylan (InWAX) compared to a monosaccharide mixture.

### **Supplementary Data 2**

**Description:** Fold change comparison of known arabinoxylan targeting PUL of *B. intestinalis* during growth on soluble (sWAX) or insoluble wheat arabinoxylan (InWAX) compared to a monosaccharide mixture.
